# Supplementary material for: Mitochondrial phenotypes in purified human immune cell subtypes and cell mixtures
Source: bioRxiv or medRxiv preprint supplement (doi:10.1101/2020.10.16.342923), 2021-10-15
Supplement: Supplementary file [file media-2.pdf]

# SUPPLEMENTAL MATERIAL

# Supplemental Figure 1

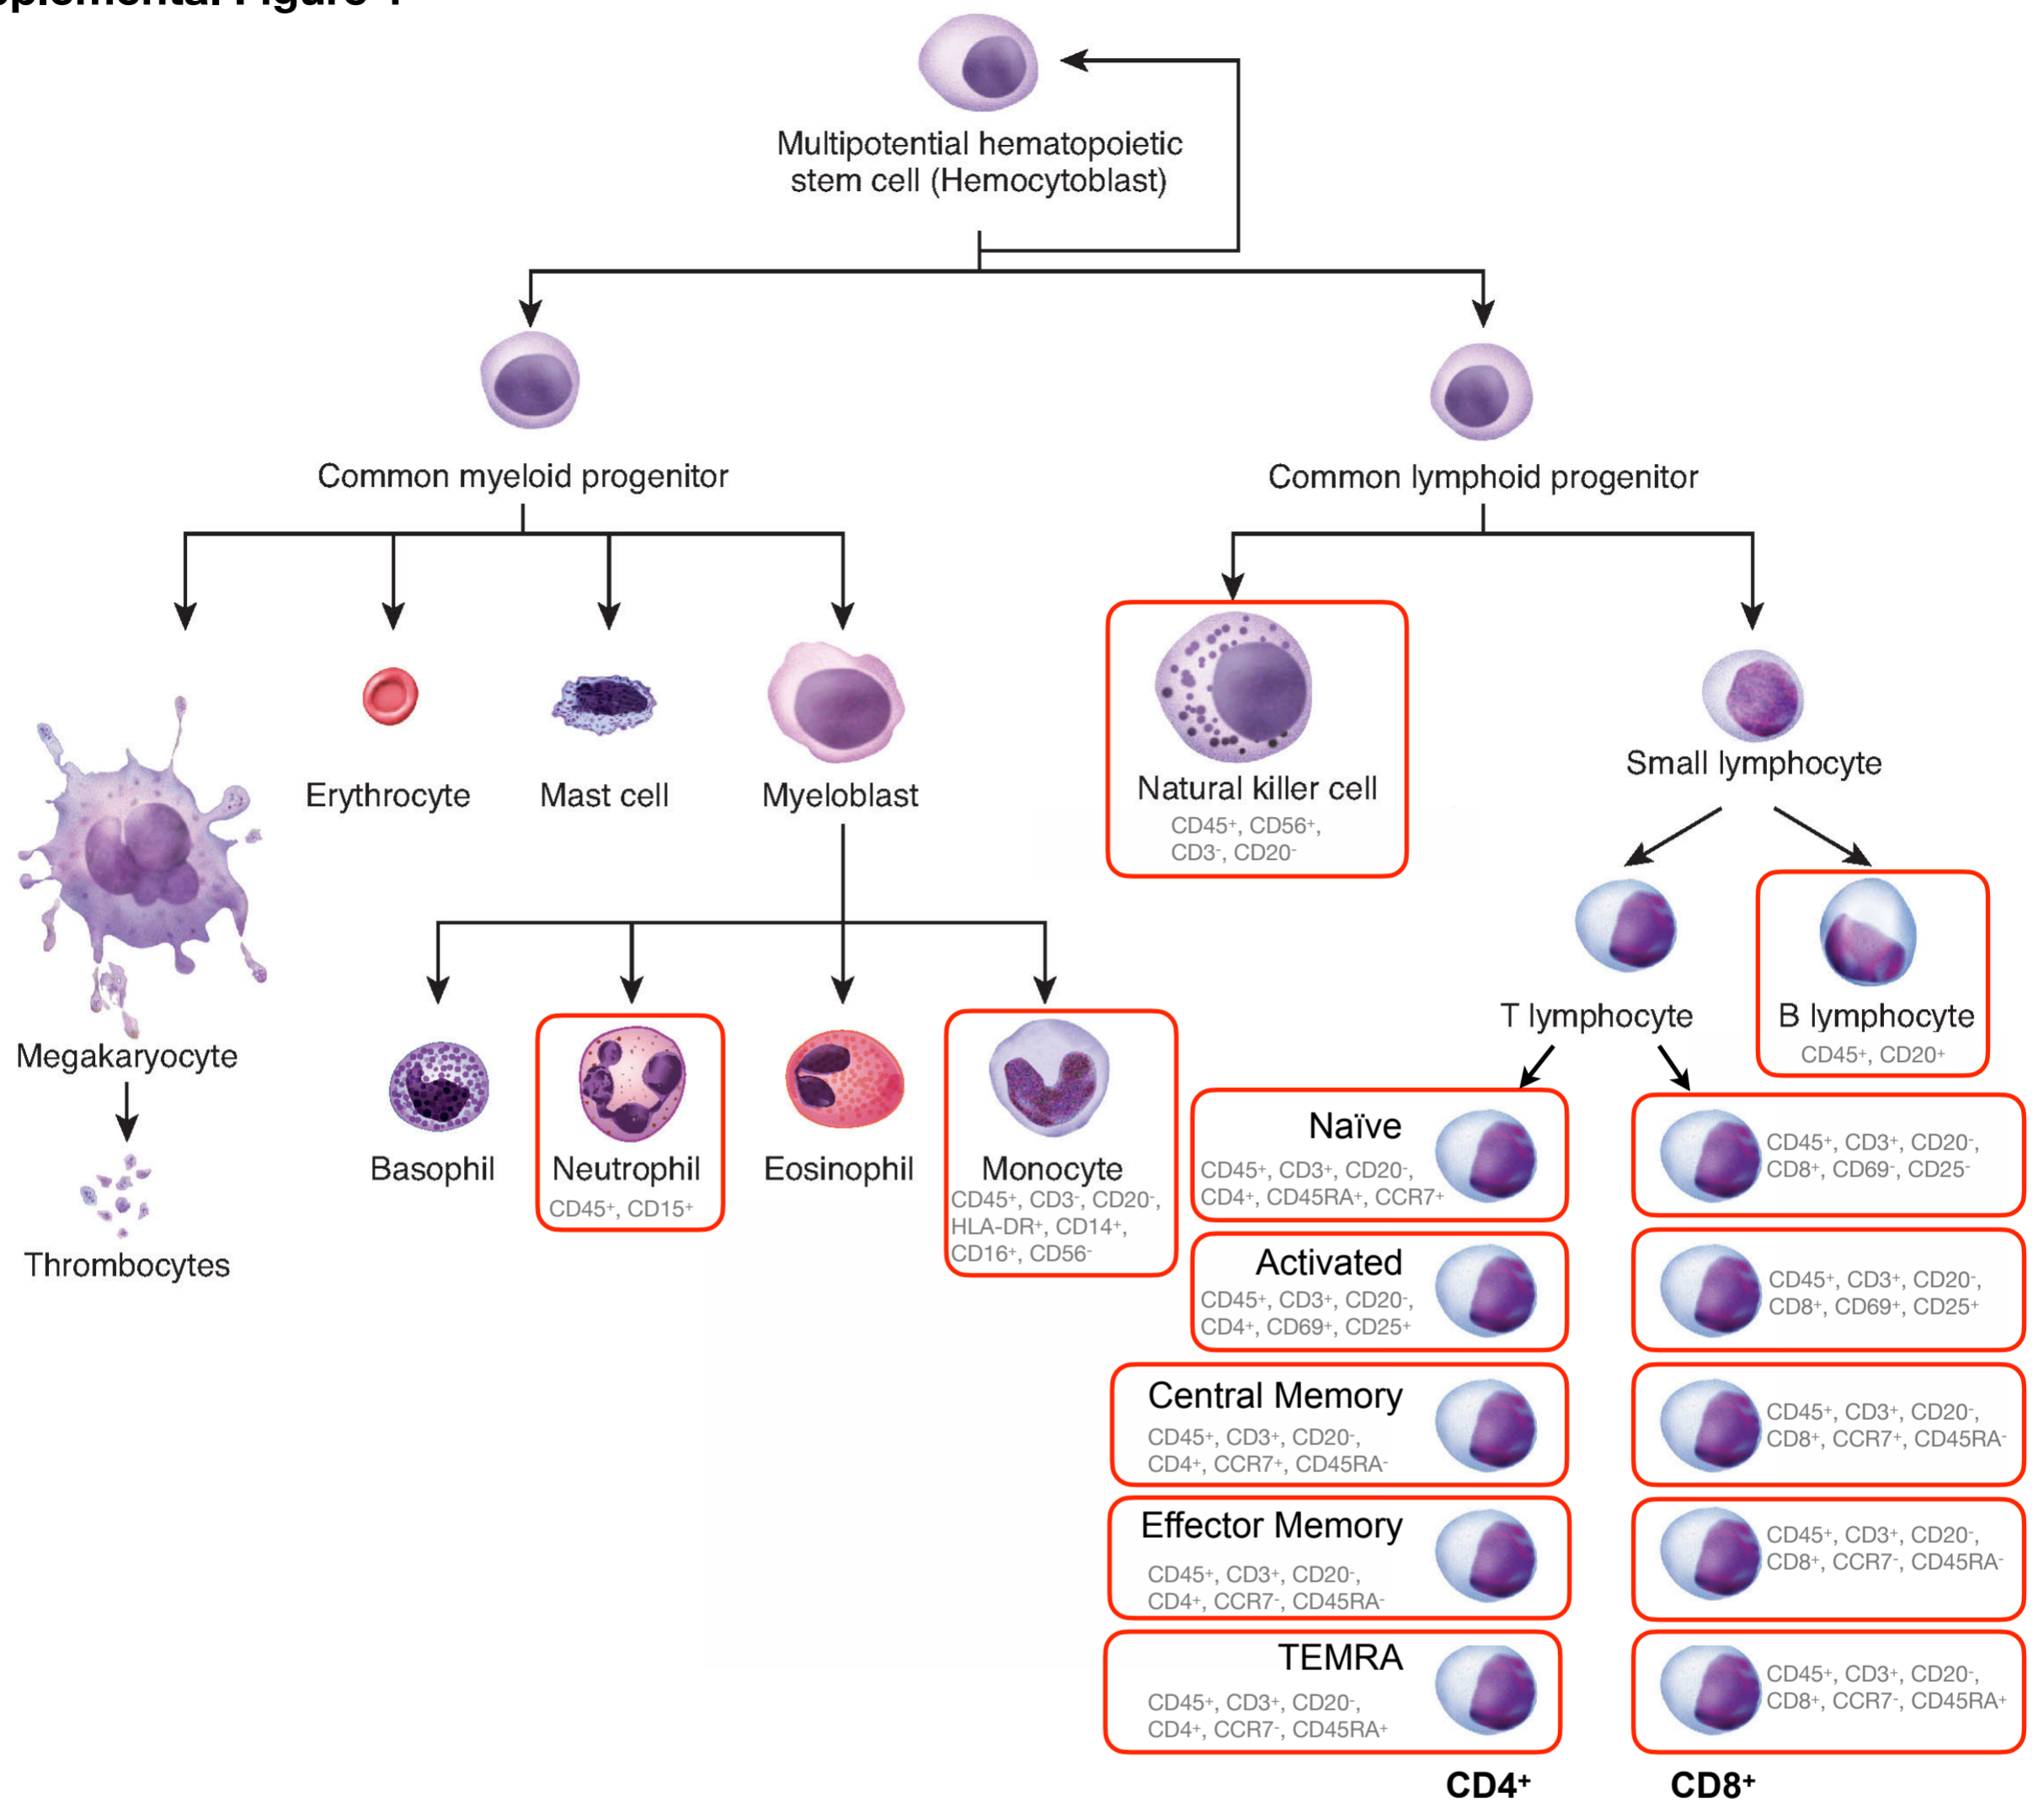

**Supplemental Figure 1 – Diagram of leukocyte cell lineages.**

Cells analyzed in this study are circled in red. The cell surface markers used to define sub-populations are indicated below each cell subtype. Diagram adapted from: [https://oerpub.github.io/epubjs-demo-book/content/m46036.xhtml#fig-ch03\\_06\\_01](https://oerpub.github.io/epubjs-demo-book/content/m46036.xhtml#fig-ch03_06_01).

## Supplemental Figure 2

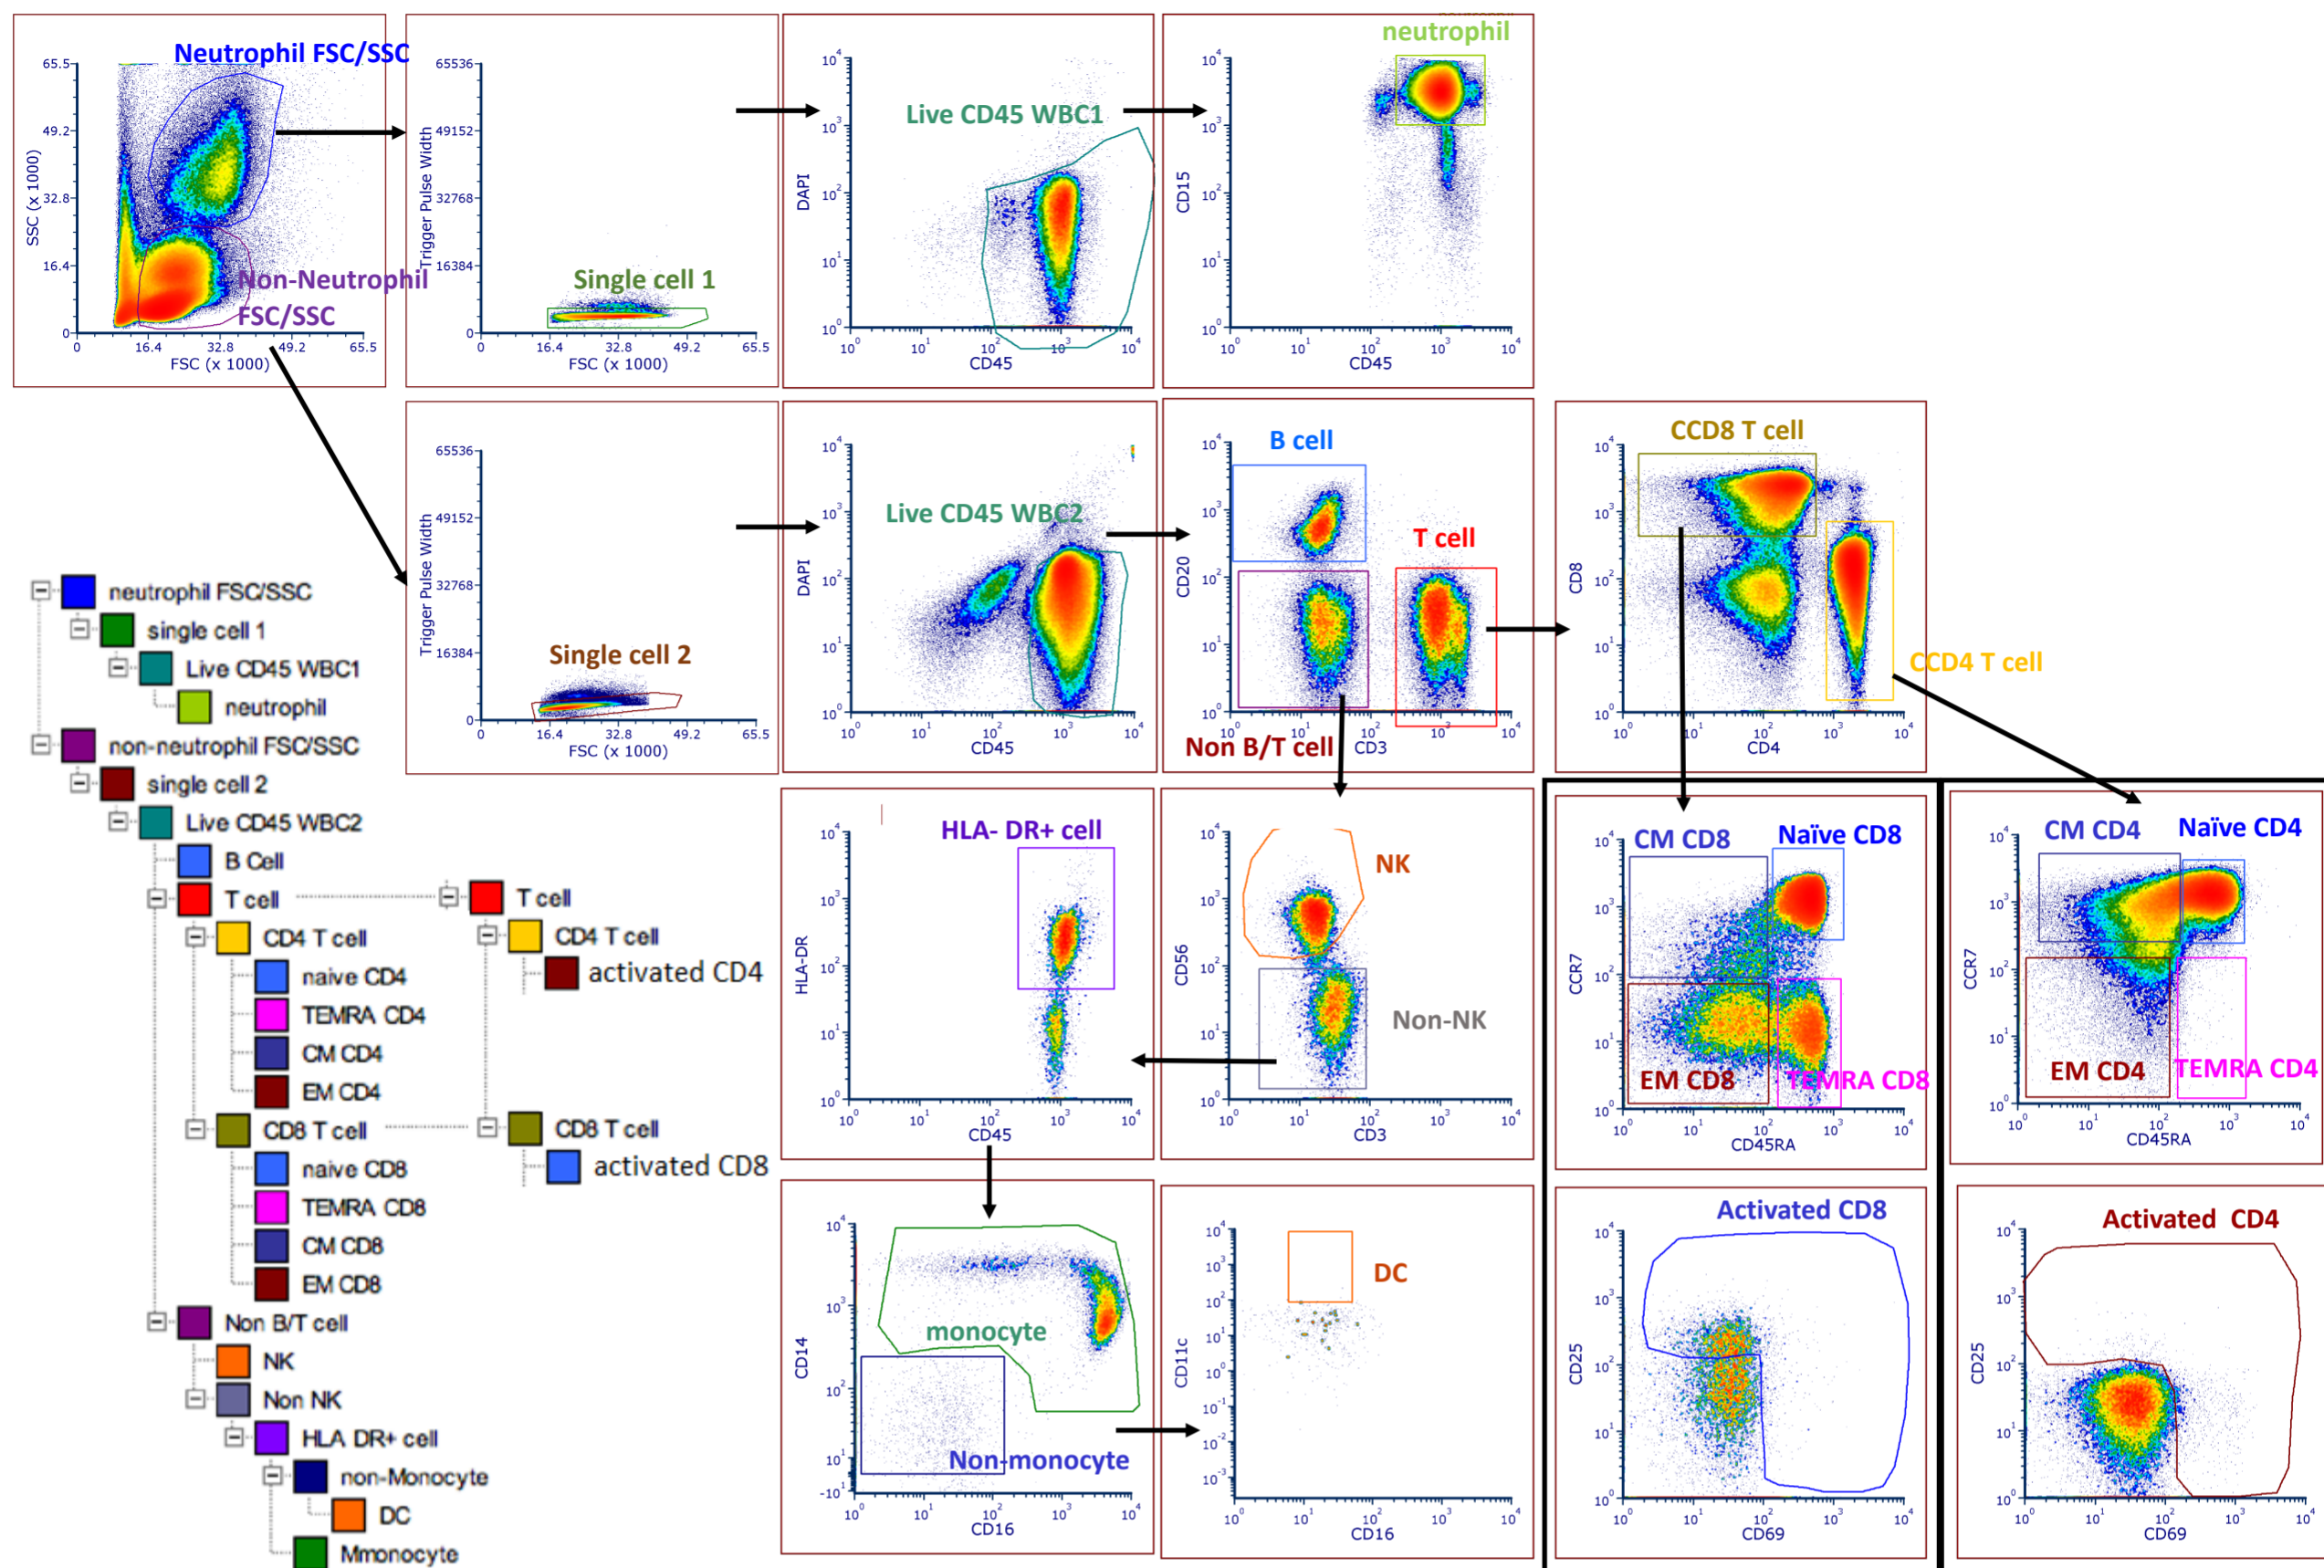

### Supplemental Figure 2 – Gating strategy to quantify all cell subtypes and sorting major cell subtypes for mitochondrial phenotyping.

See the methods section for details of labeling cocktails and cell sorter parameters. An initial run of 2M cells was used to establish the six most abundant cell subtypes (targets) for each participant, followed by FACS to obtain at least one 5M aliquot of each target cell subtype. Up to five 5M aliquots were collected per cell subtype, per participant, to establish technical variability in downstream assays.

## Supplemental Figure 3

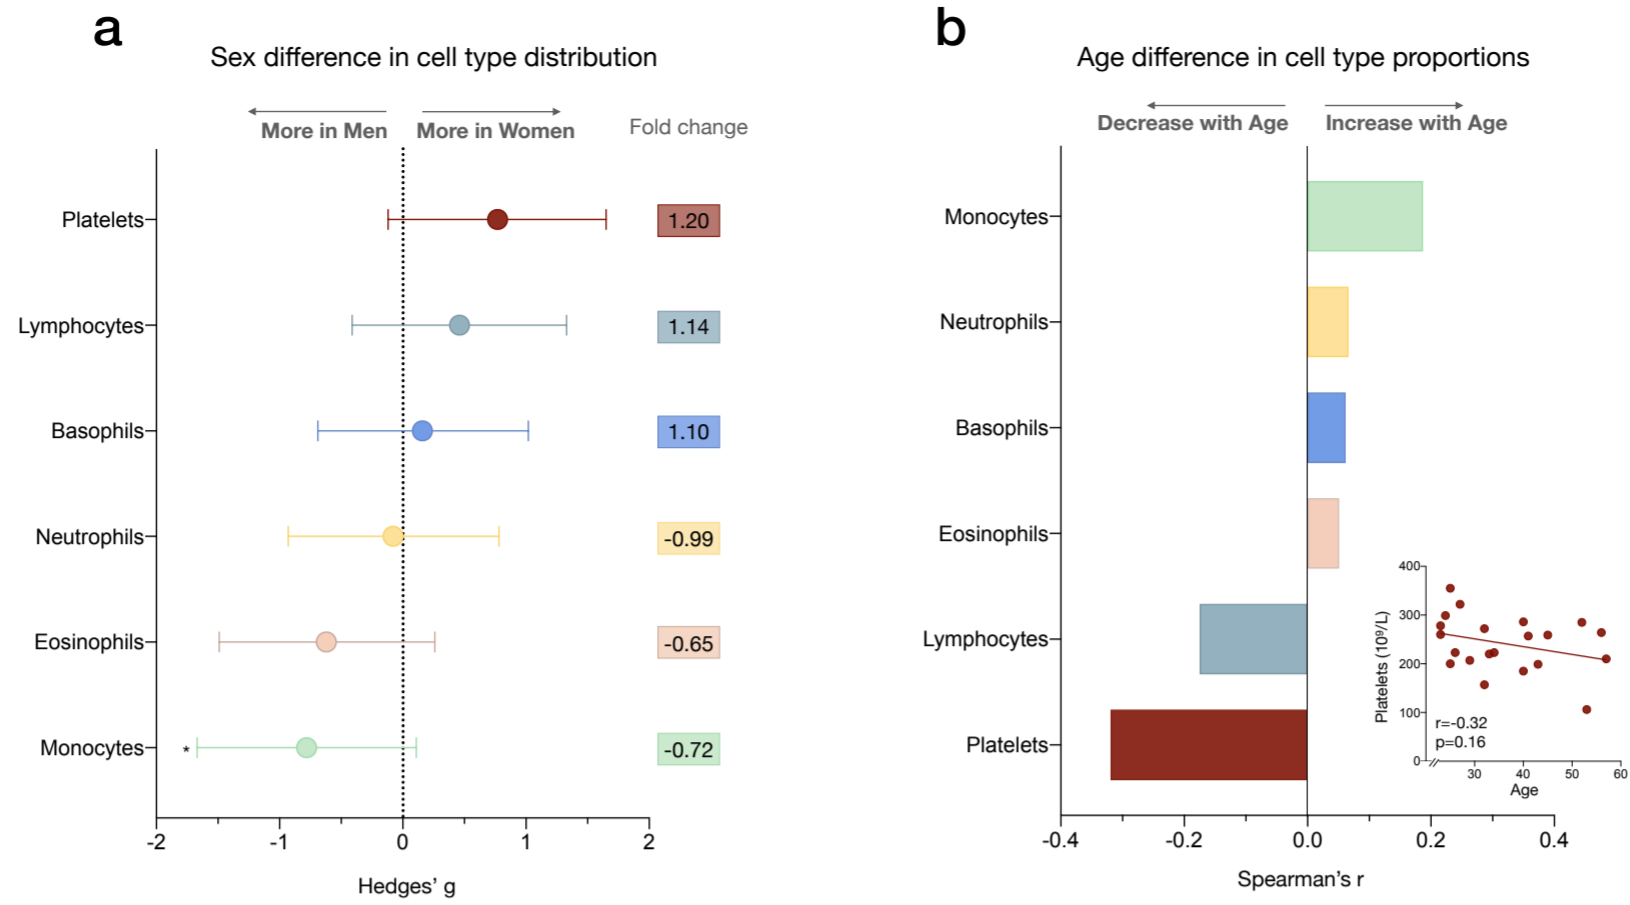

### Supplemental Figure 3 – Sex differences and age correlations with leukocyte abundance measured by complete blood count.

(a) Forest plot illustrating the effect size (g) of the sex differences in cell proportion derived from the complete blood count (CBC) results (n=21). Fold changes in the raw values are also shown. P-values from non-parametric Mann-Whitney T test. Error bars reflect the 95% C.I. on the effect size. (b) Correlation (Spearman's r) between age and cell proportion derived from the complete blood count. n=21, p<0.05\*.

# Supplemental Figure 4

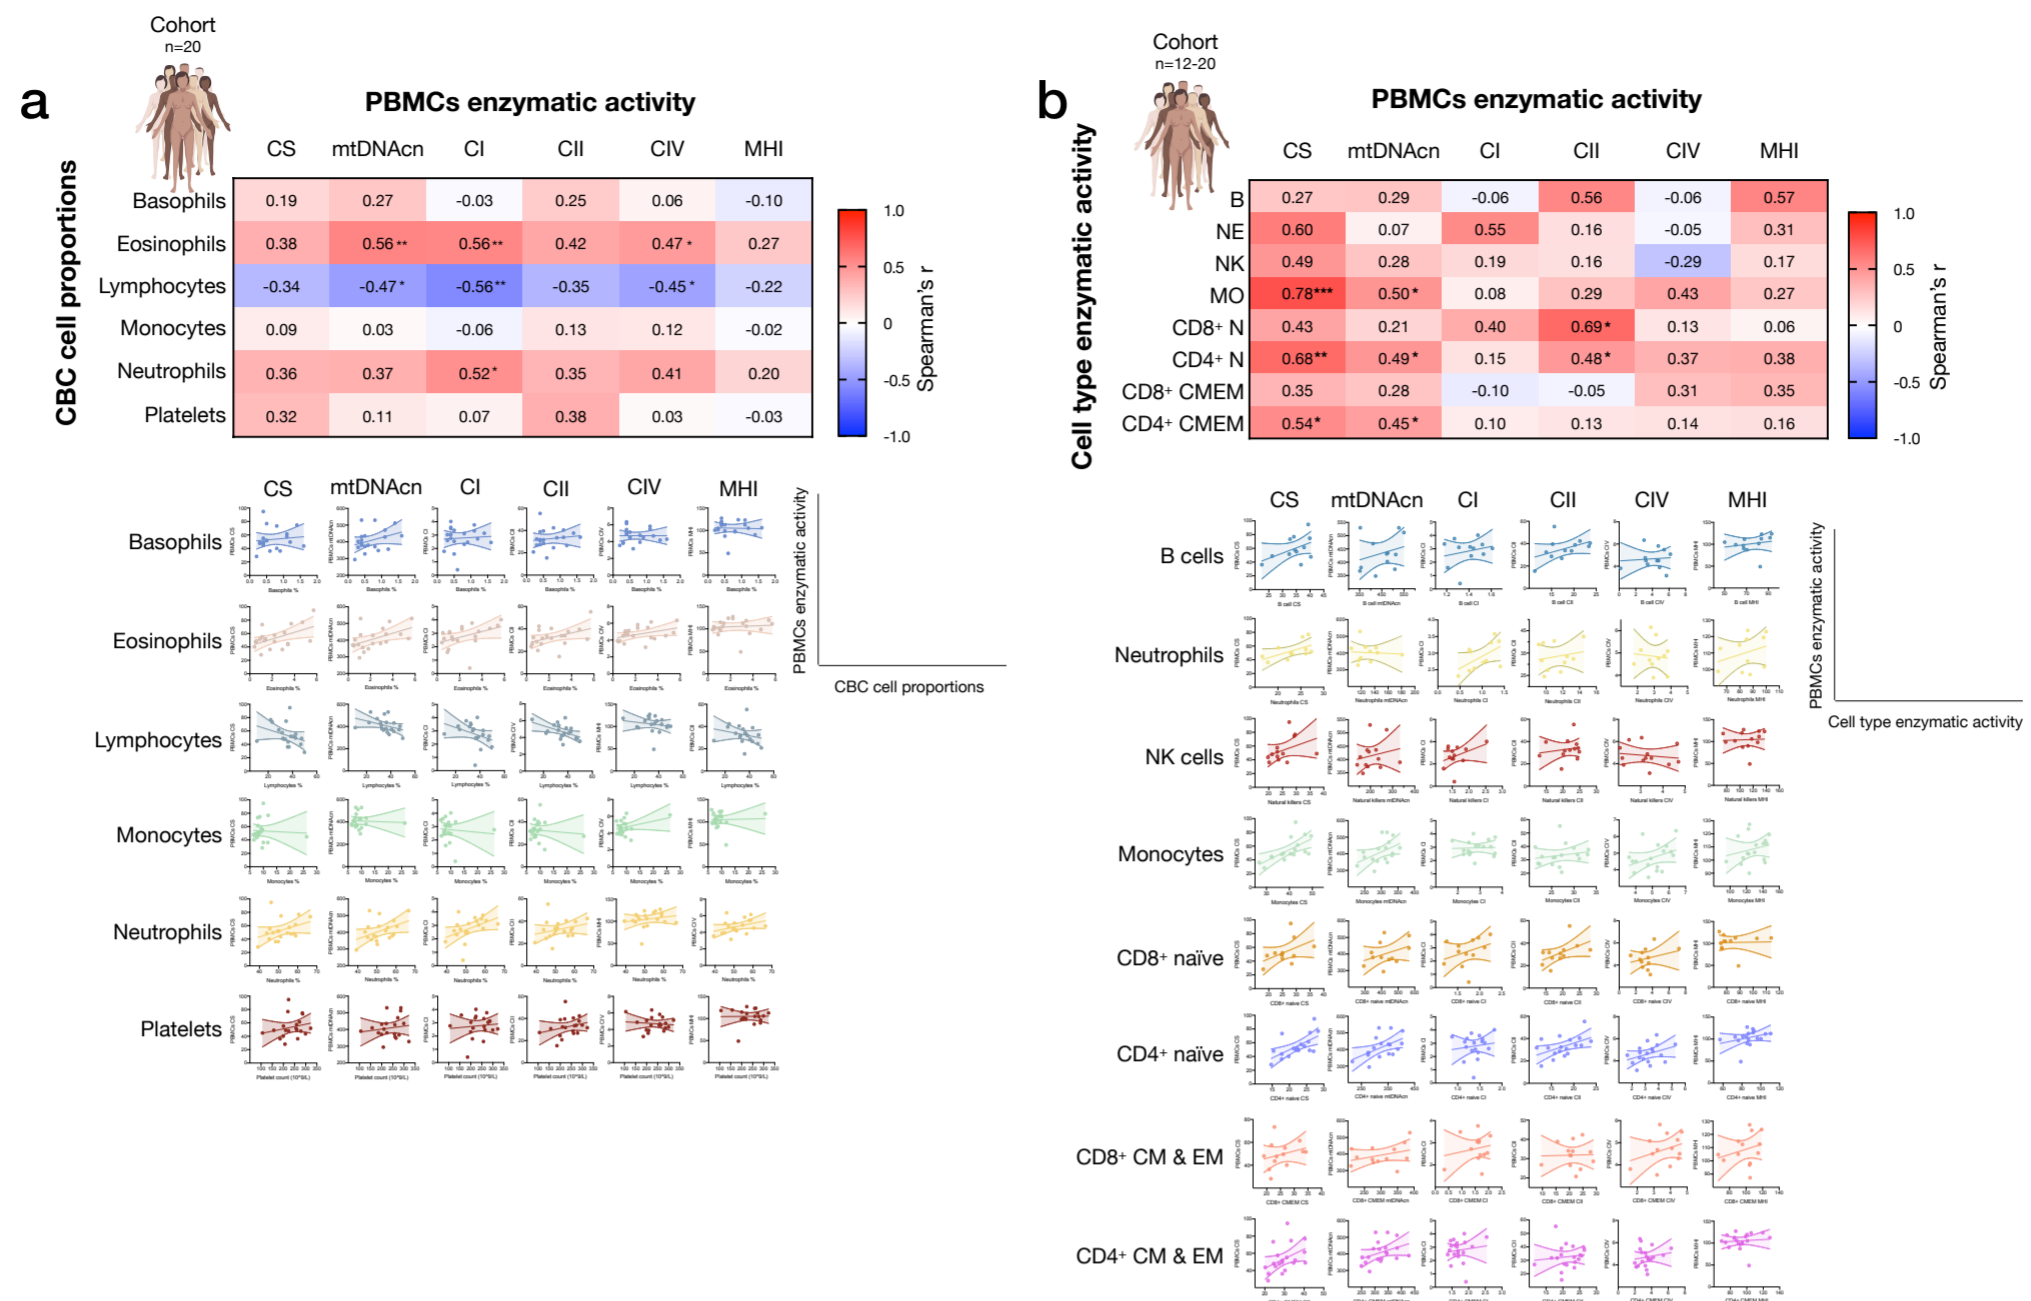

## Supplemental Figure 4 – Associations between CBC cell proportions and subtype-specific enzymatic activities with mitochondrial features measured in PBMCs.

(a) Correlations between CBC-based cell type abundance (% of total leukocytes) and PBMCs mitochondrial features for the cohort (n=20). (b) Correlations of the mitochondrial features measured in each cell subtype and the same mitochondrial feature measured in PBMCs for the cohort (n=12-20). Heatmaps for the cohort show to what extent PBMCs-based measures reflect activities in various immunologically-defined cell subtypes. This data integrates data presented in Figure 5, here focused on PBMCs.

# Supplemental Figure 5

**a**

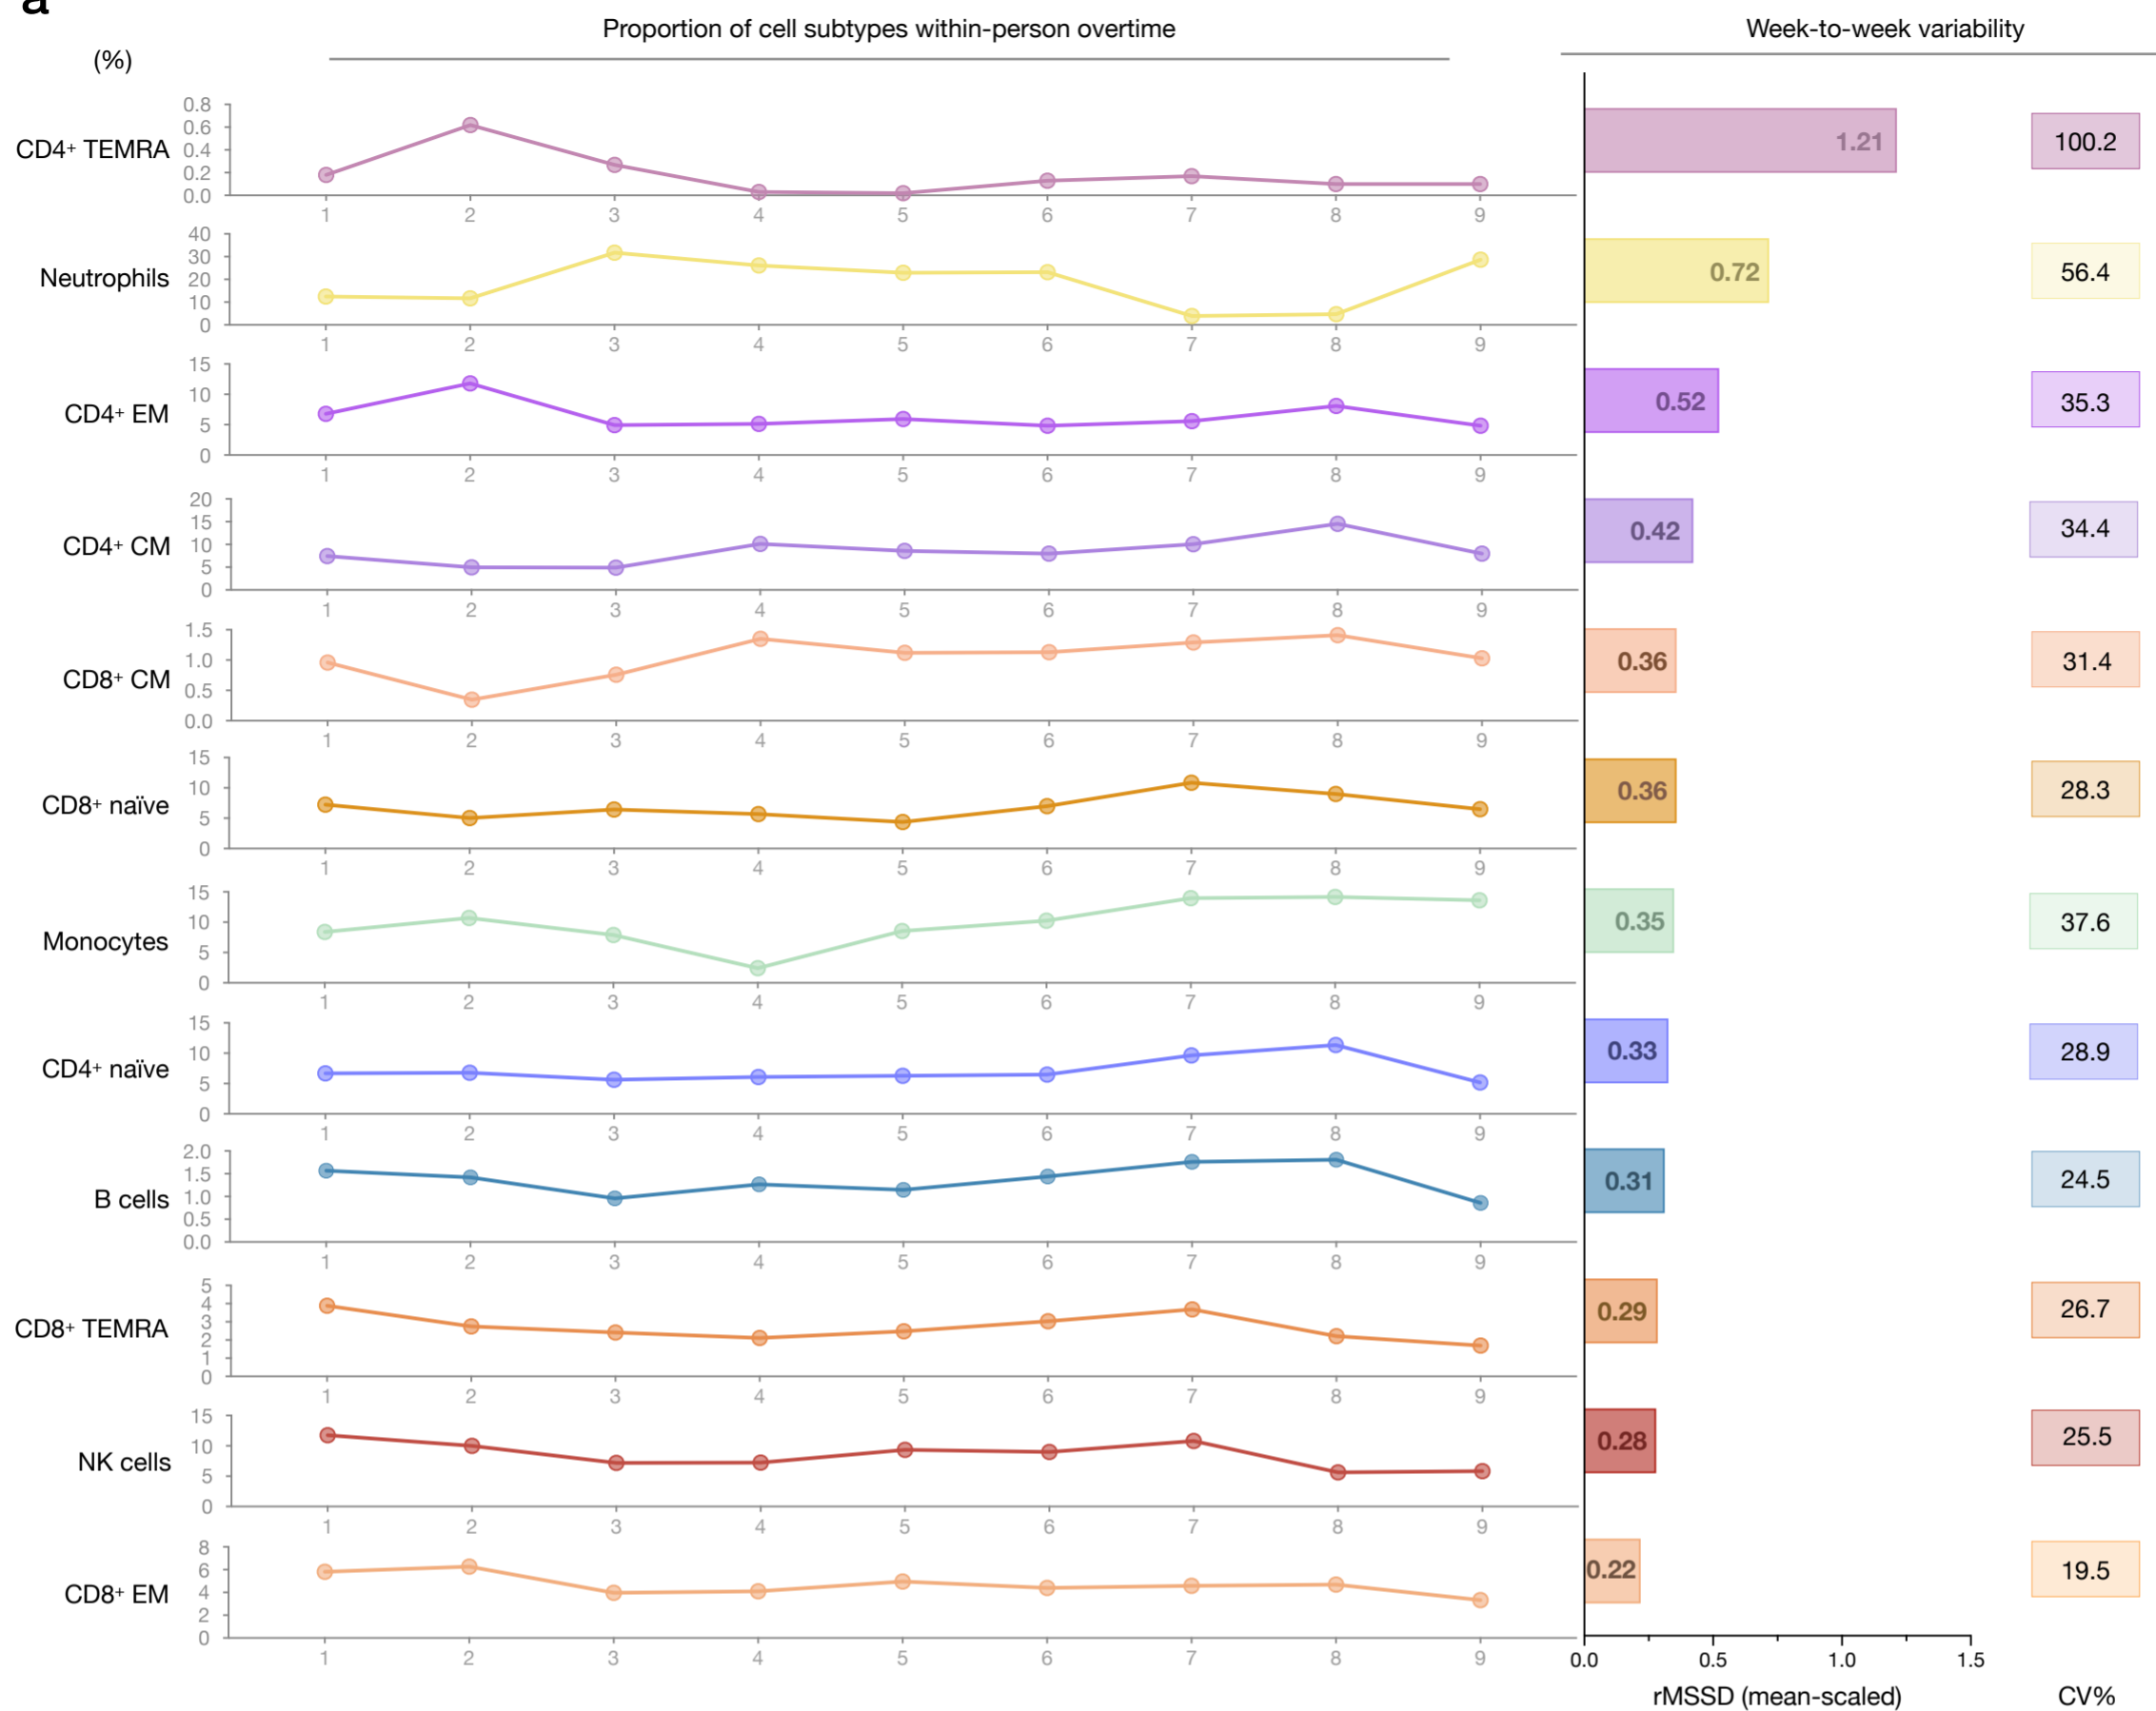

**b**

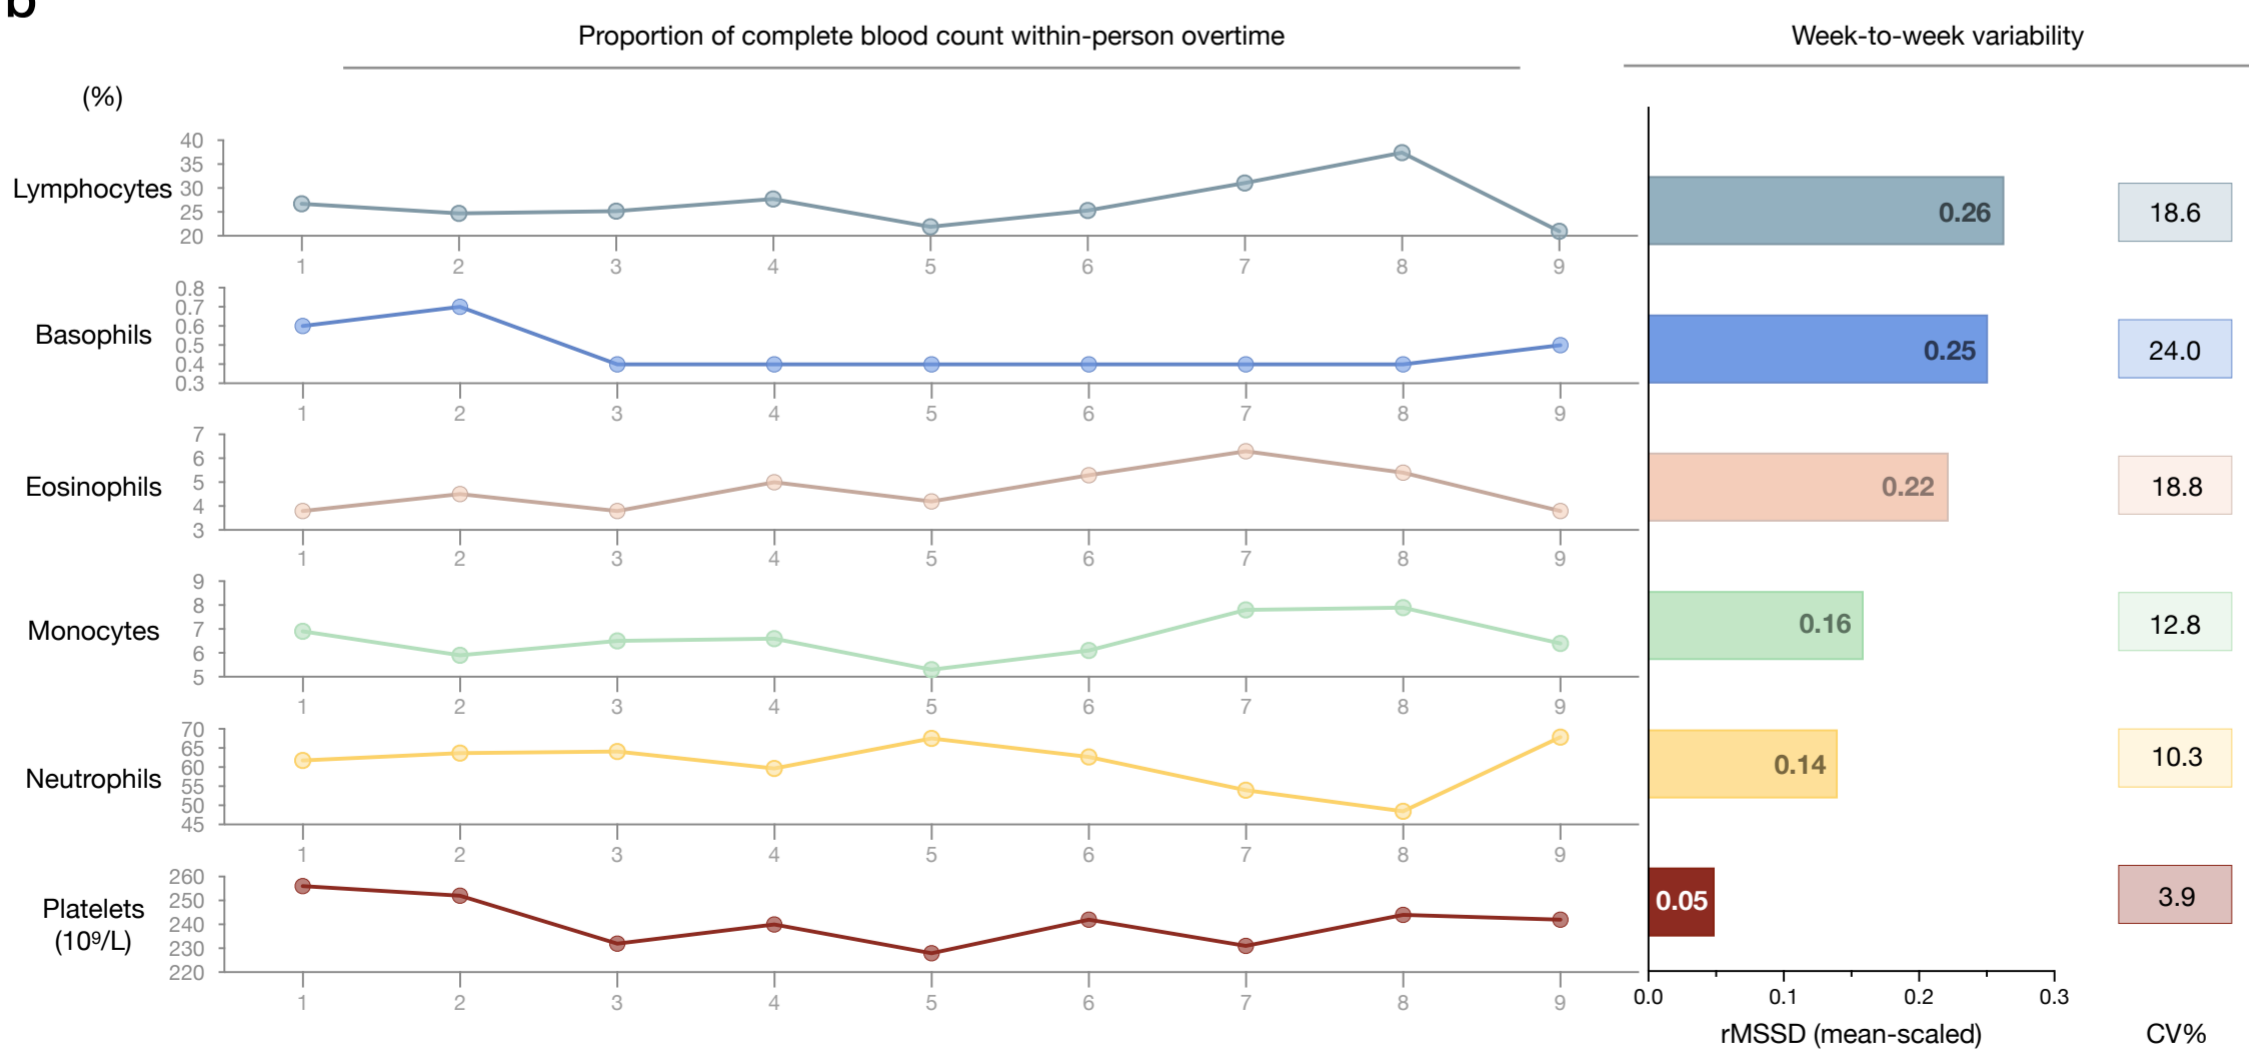

**Supplemental Figure 5 – Within-person variability of cell subtype proportions overtime.** (a) Within-person variation of cell type proportions across 9 weeks. The FACS-derived raw cell proportions (% of total cells) are shown on the left. Root mean square of successive differences (rMSSD) illustrating the magnitude of variability between successive weeks, and C.V. illustrating the magnitude of variability across the total 9 weeks are provided on the right for each cell subtype, by mitochondrial feature. (b) Same as a, but based on CBC results.

# Supplemental Figure 6

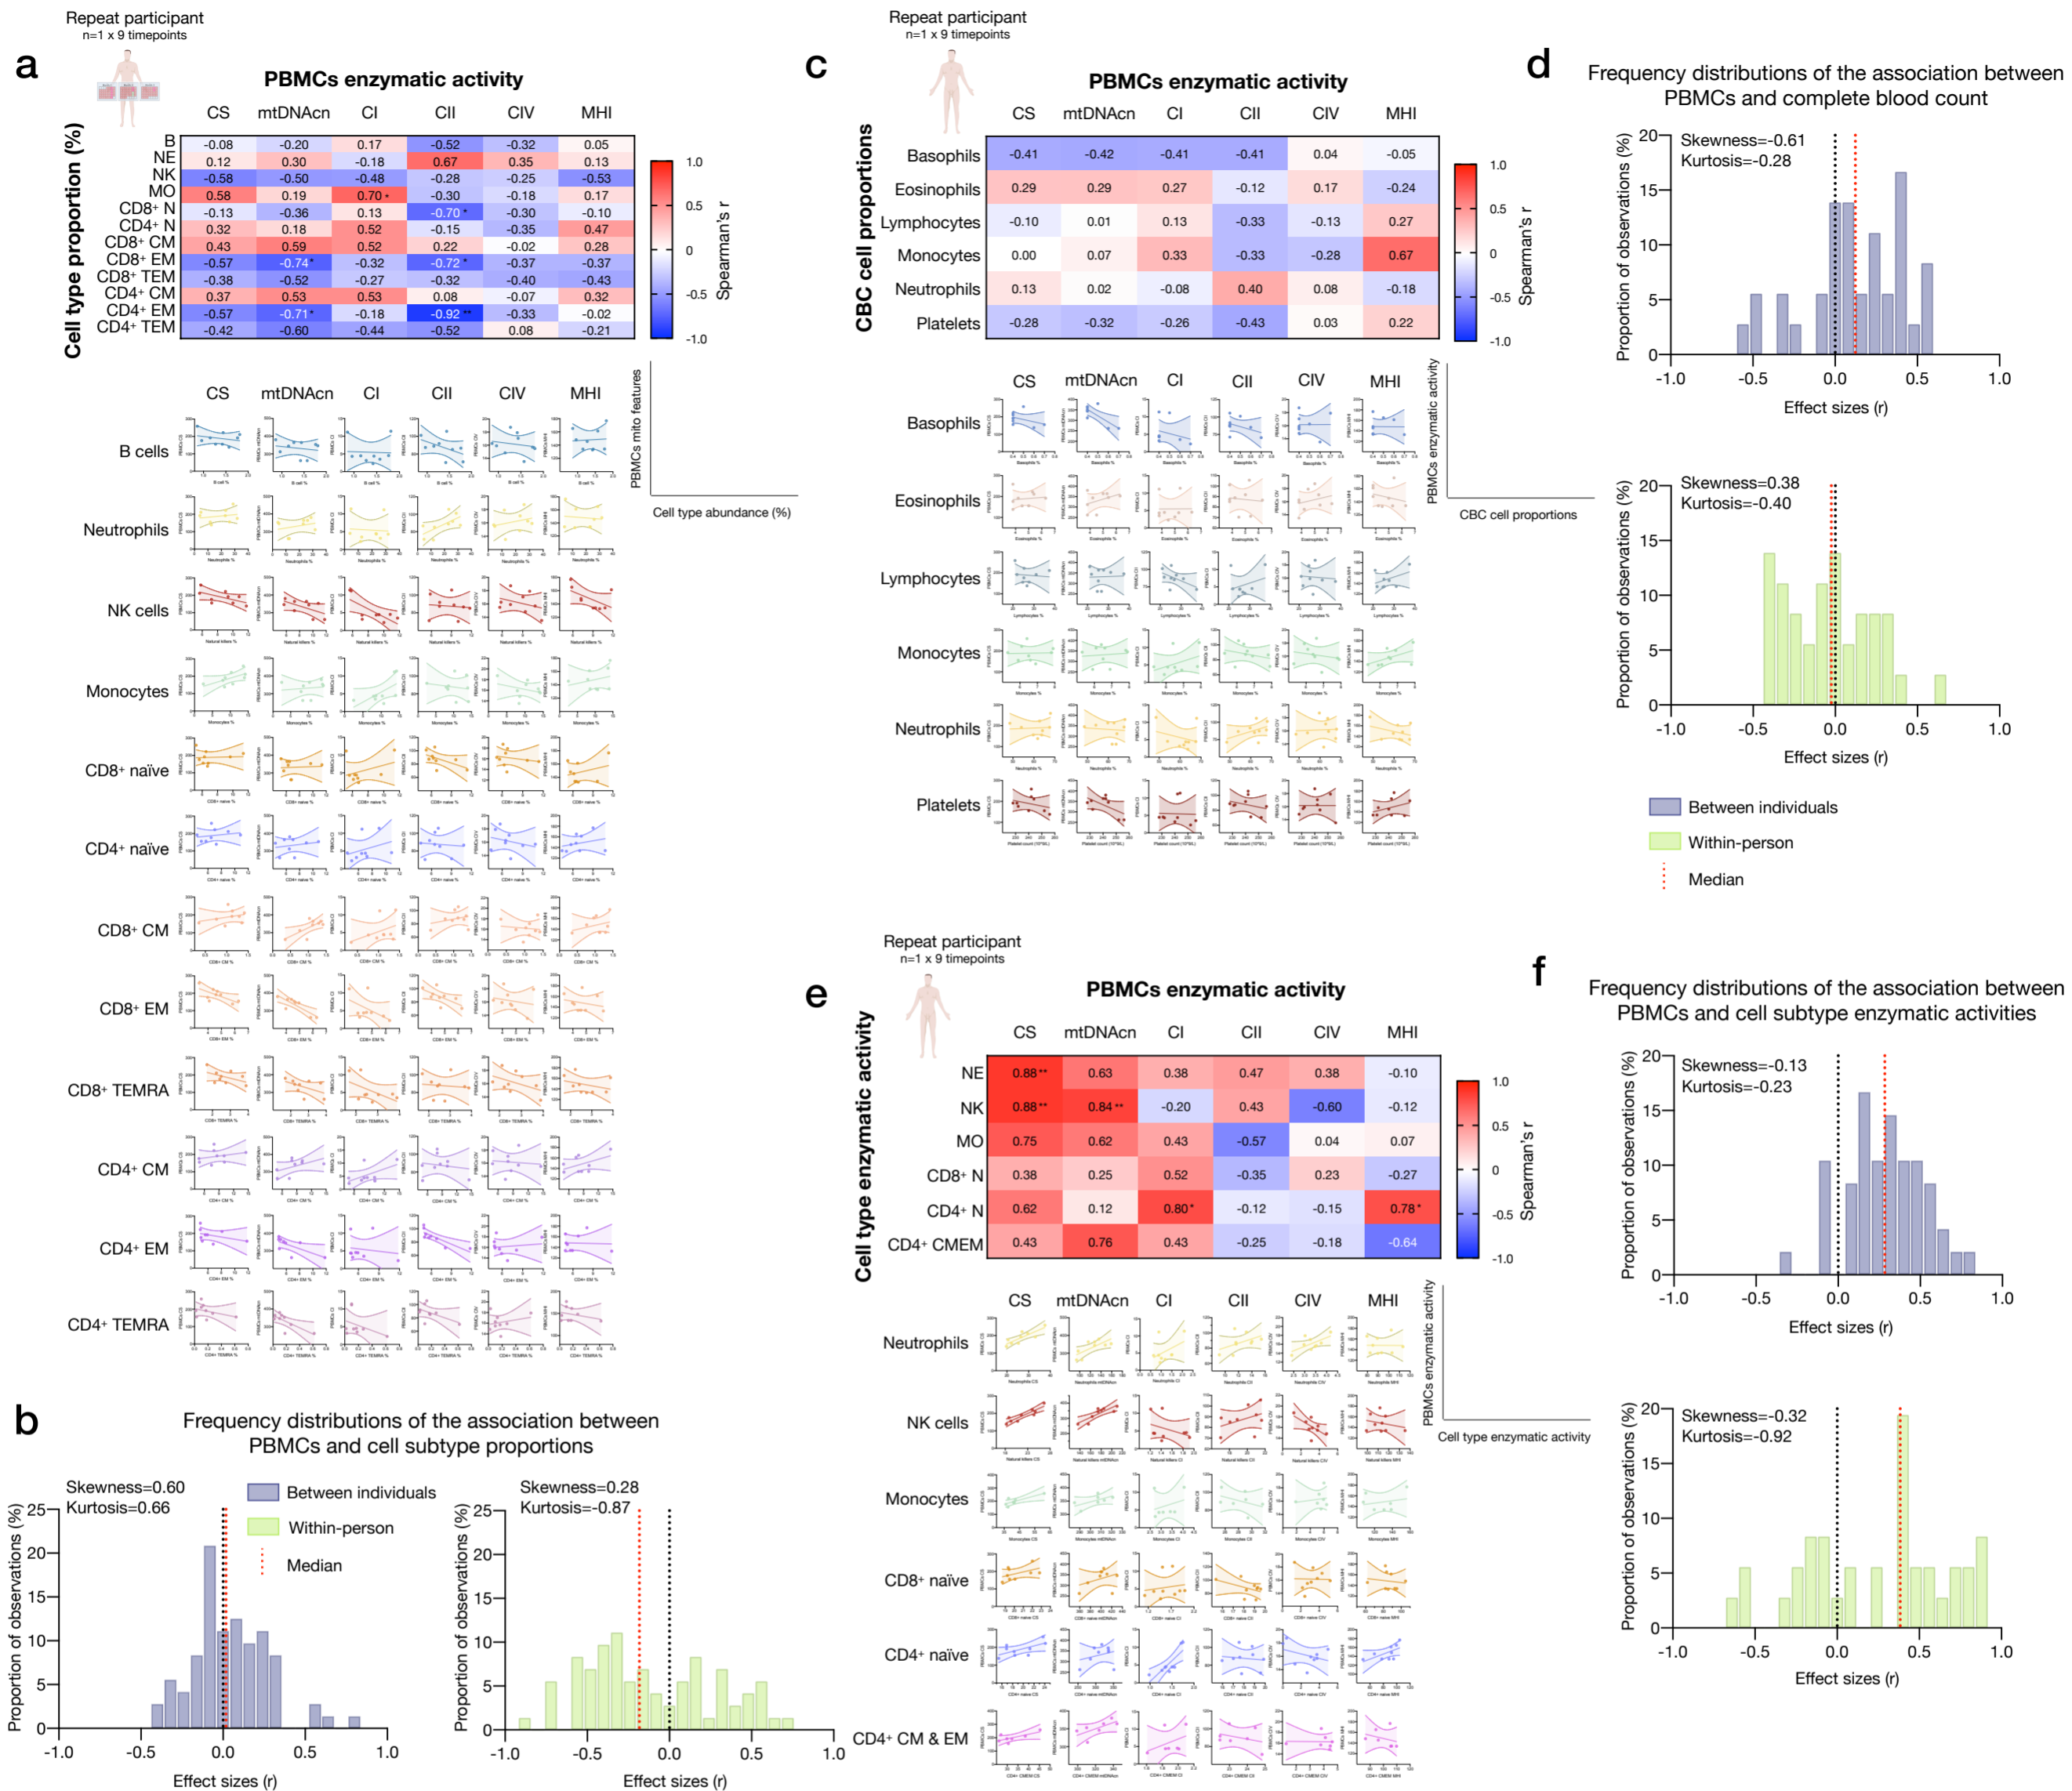

**Supplemental Figure 6 – Associations between subtype-specific and CBC cell proportions, and subtype-specific enzymatic activities with mitochondrial features measured in PBMCs.** (a) Pairwise correlations of cell subtype proportions obtained from cell sorting with mitochondrial features measured in PBMCs for the repeat participant (n=1 x 9 timepoints). Aggregate correlations are shown as a heatmap (top) and individual scatterplots (bottom). (b) Frequency distributions of the effect sizes between PBMC mitochondrial features and cell subtypes proportions for the cohort (Figure 2) and the repeat participant (total correlation pairs=72, for both). (c) Correlations between CBC-based cell type abundance (% of total leukocytes) and PBMCs mitochondrial features for the repeat participant (n=1 x 9 timepoints). (d) Frequency distribution of effect sizes. (e) Correlations of the mitochondrial features measured in each cell subtype and the same mitochondrial feature measured in PBMCs for the repeat participant. Heatmaps for the repeat participant (n=1 x 9 timepoints) show to what extent PBMCs-based measures reflect activities in various immunologically-defined cell subtypes. This data integrates data presented in Figure 7, here focused on PBMCs. (f) Frequency distributions of effect sizes for association between PBMC and cell subtype mitochondrial features for the cohort and the repeat participant (total correlation pairs=36, for both), showing a predominance of positive correlations.

# Supplemental Figure 7

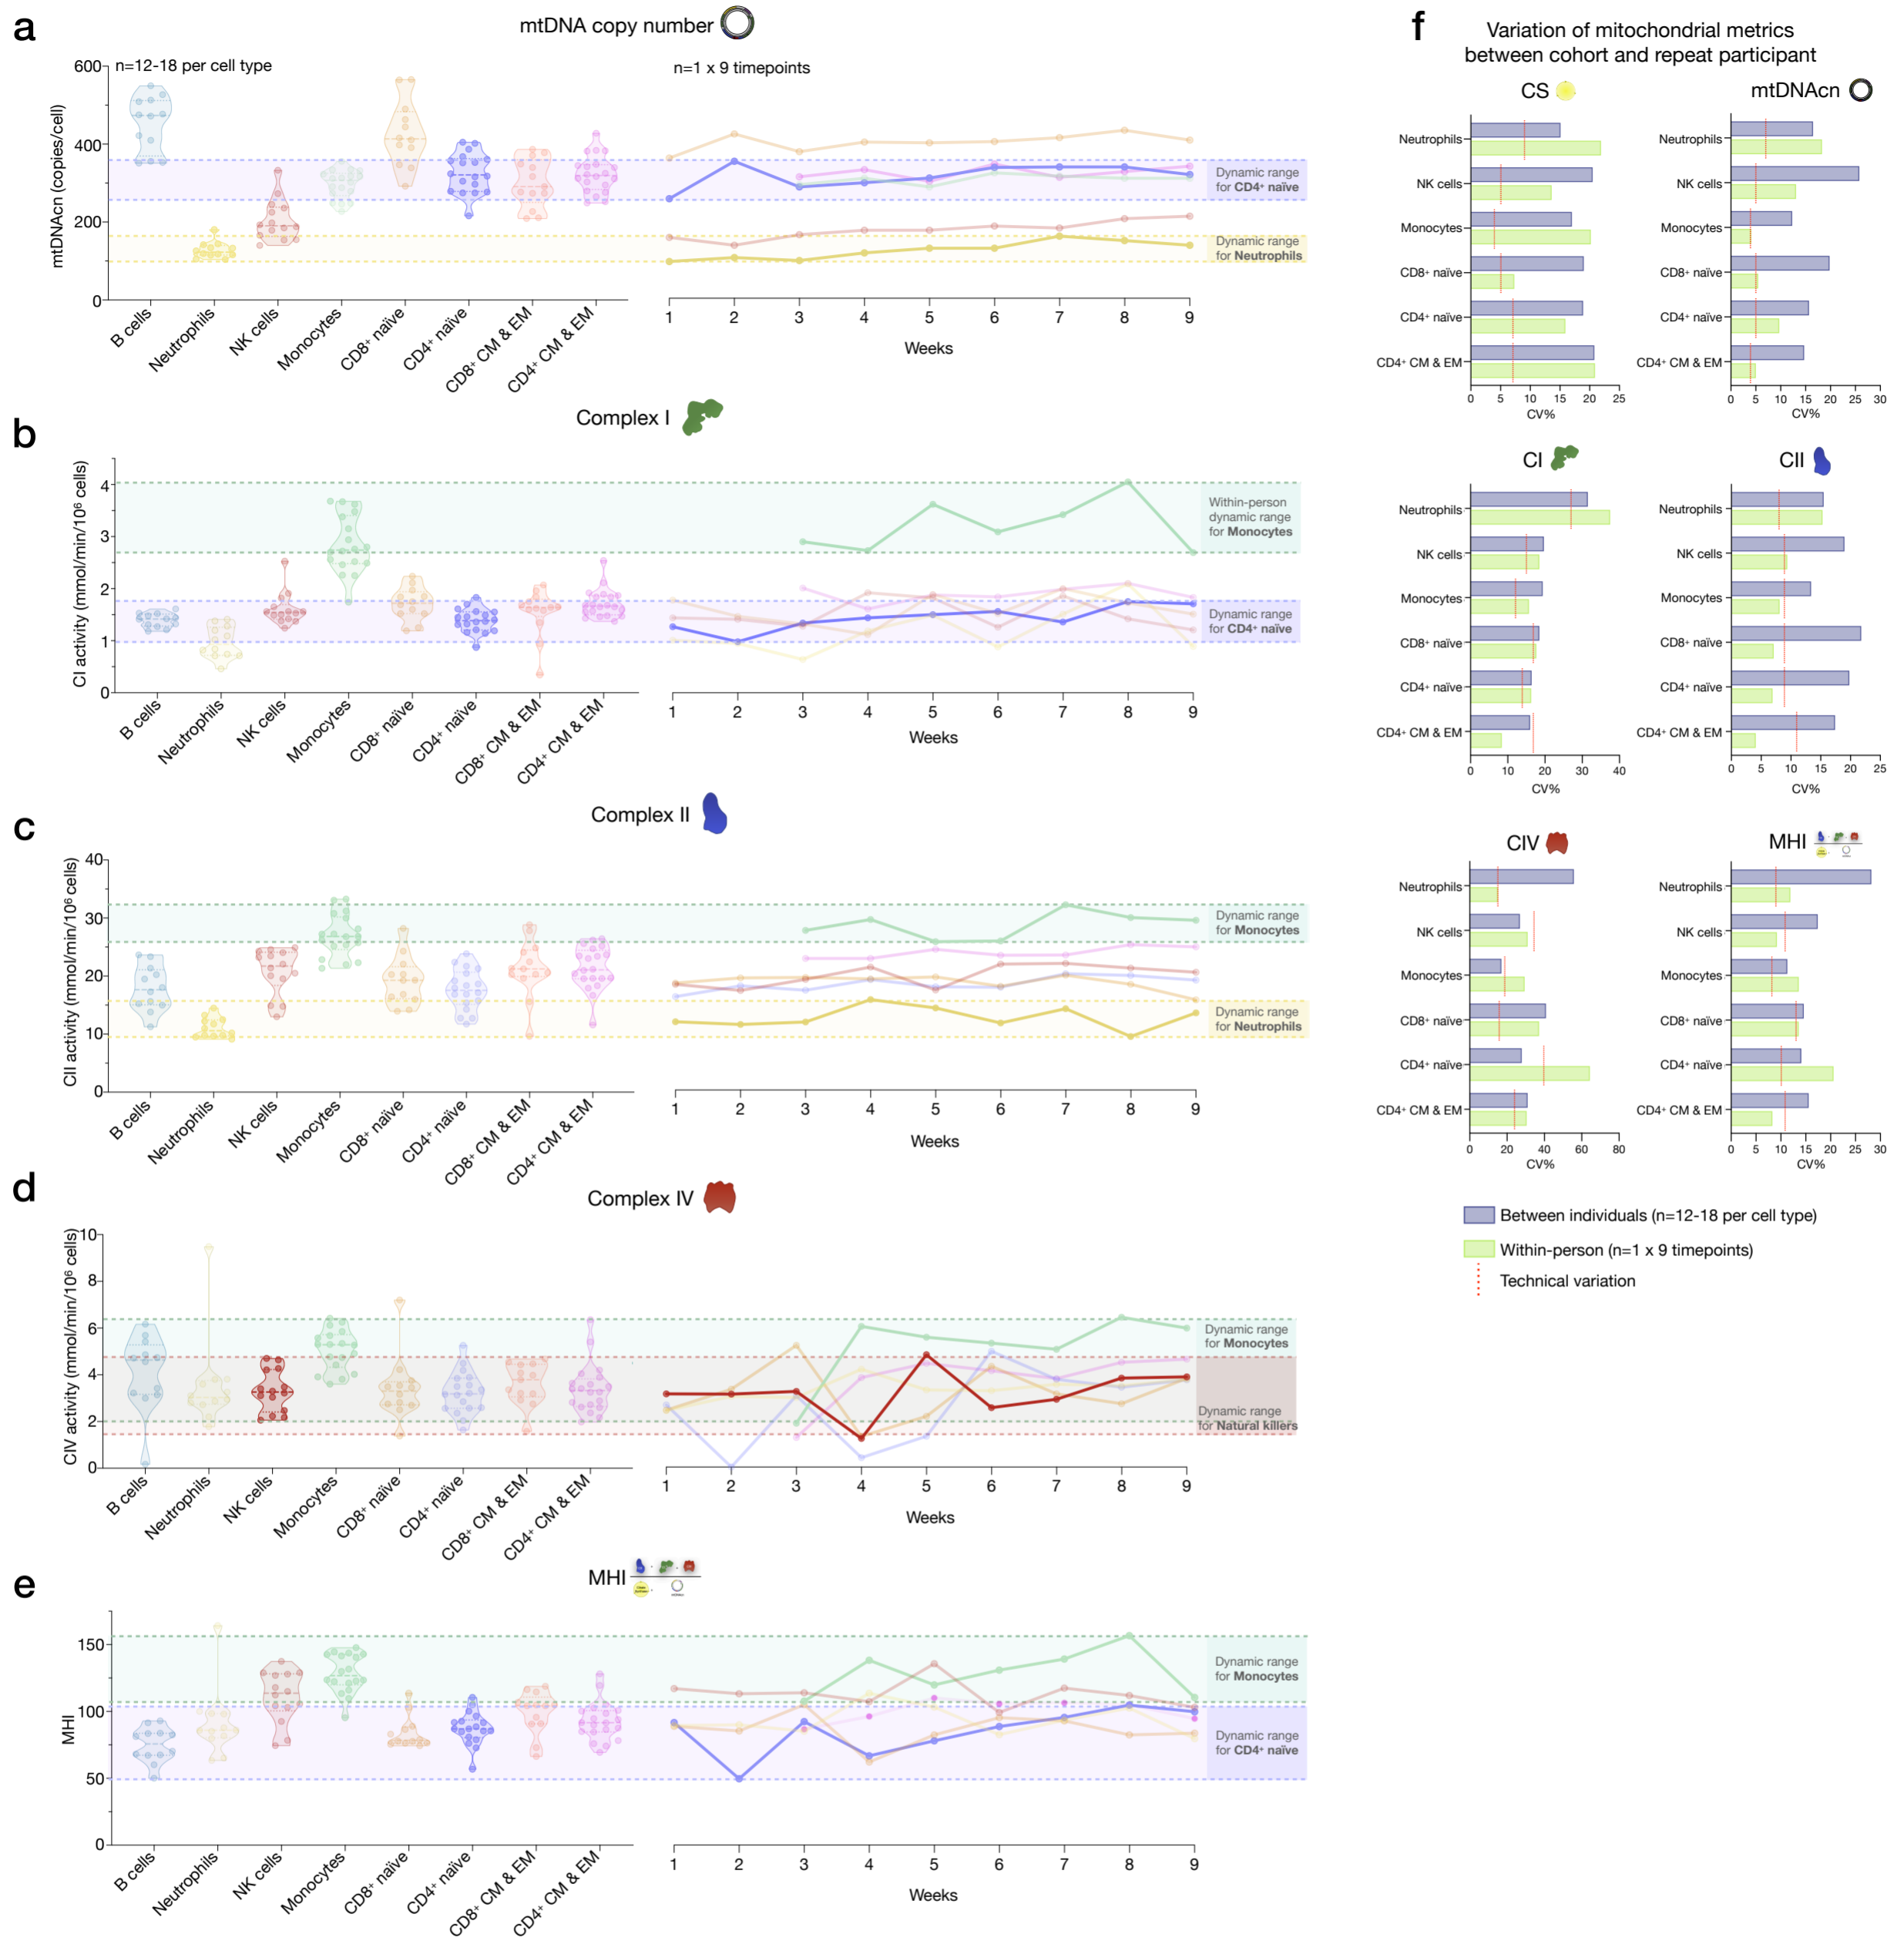

## Supplemental Figure 7 – Variability of mitochondrial features across cell subtypes between the cohort and the repeat participant.

(a-e) Side-by-side comparison of mitochondrial features between the cohort (n=12-18 per cell type) and the repeat participant (n=1 x 9 timepoints) across cell subtypes. This figure shows the same data as in main Figure 5h, but for all mitochondrial features. (f) Summary of a-e illustrated by a bar graph showing observed variation (C.V.) of mitochondrial features between the cohort and the repeat participant. The technical variation established on a subset of samples and likely represents a conservative overestimation of noise is shown by red lines.



## Supplemental Figure 8

| Mitotype                                                                                    | Interpretation                                                      | Index                                              |
|---------------------------------------------------------------------------------------------|---------------------------------------------------------------------|----------------------------------------------------|
| Complex I activity (CI)/CS<br>Complex II activity (CII)/CS<br>Complex IV activity (CIV)/CS  | RC enzymatic activity<br>per unit of mito<br>content                | RC enzyme<br>activity per CS                       |
| mtDNAcn/CS                                                                                  | Mito genome density                                                 |                                                    |
| CI/CII<br>CI/CIV<br>CIV/CII                                                                 | RC enzymatic activity<br>ratios                                     | RC enzyme<br>ratios                                |
| CI/mtDNAcn<br>CII/mtDNAcn<br>CIV/mtDNAcn                                                    | RC enzymatic activity<br>per unit of genome                         | RC enzyme<br>per mtDNA                             |
| CI / (mtDNAcn/CS)<br>CII / (mtDNAcn/CS)<br>CIV / (mtDNAcn/CS)                               | RC enzymatic activity<br>per unit of mtDNA<br>density               | RC enzyme<br>per mtDNA<br>density                  |
| (CI/mtDNAcn) / (mtDNAcn/CS)<br>(CII/mtDNAcn) / (mtDNAcn/CS)<br>(CIV/mtDNAcn) / (mtDNAcn/CS) | RC enzymatic activity<br>per genome in relation<br>to mtDNA density | RC enzyme<br>per mtDNA<br>rel. to mtDNA<br>density |

### Supplemental Figure 8 – Operationalization and categorization of mitotypes.

Chart illustrating mitotype ratios and their simple interpretations.

## Supplemental Table 1

| Cell Type                                                                                                             | Biological function                                                                                                                                                                                                                                             | Markers                                                                                                                                    |
|-----------------------------------------------------------------------------------------------------------------------|-----------------------------------------------------------------------------------------------------------------------------------------------------------------------------------------------------------------------------------------------------------------|--------------------------------------------------------------------------------------------------------------------------------------------|
| <b>B cells</b>                                                                                                        | Present antigens as well as provide co-stimulation and cytokines to T cells, in turn producing antigen specific antibodies (Hoffman, Lakkis et al. 2016).                                                                                                       | CD45 <sup>+</sup> , CD20 <sup>+</sup>                                                                                                      |
| <b>Neutrophils</b>                                                                                                    | Recruited to sites of infection, having the ability to recognize and phagocytose microbes, and then kill pathogens through a combination of cytotoxic mechanisms (Mayadas, Cullere et al. 2014).                                                                | CD45 <sup>+</sup> , CD15 <sup>+</sup>                                                                                                      |
| <b>NK cells</b><br>Natural killer cells                                                                               | Effector lymphocytes in the innate immune response with cytotoxicity and cytokine producing functions (Vivier, Tomasello et al. 2008).                                                                                                                          | CD45 <sup>+</sup> , CD56 <sup>+</sup> , CD3 <sup>-</sup> , CD20 <sup>-</sup>                                                               |
| <b>Monocytes</b>                                                                                                      | In response to infection or injury, monocytes can phagocytose and present antigens, secrete chemokine and proliferate. Once monocytes are recruited to tissues they are capable of differentiating into macrophages and dendritic cells (Chiu and Bharat 2016). | CD45 <sup>+</sup> , CD3 <sup>-</sup> , CD20 <sup>-</sup> , HLA-DR <sup>+</sup> , CD14 <sup>+</sup> , CD16 <sup>+</sup> , CD56 <sup>-</sup> |
| <b>CD4<sup>+</sup> naïve T cells</b>                                                                                  | Mature naïve CD4 <sup>+</sup> T cells are deployed to secondary lymphoid organs where they continuously survey for pMHC II molecules, for antigen recognition (Luckheeram, Zhou et al. 2012)                                                                    | CD45 <sup>+</sup> , CD3 <sup>+</sup> , CD20 <sup>-</sup> , CD4 <sup>+</sup> , CD45RA <sup>+</sup> , CCR7 <sup>+</sup> ,                    |
| <b>CD4<sup>+</sup> activated T cells</b>                                                                              | Mediate immune response through secretion of specific cytokines, activate other immune cells, and play a critical role in the suppression of immune reaction. Often referred to as helper T cells (Luckheeram, Zhou et al. 2012).                               | CD45 <sup>+</sup> , CD3 <sup>+</sup> , CD20 <sup>-</sup> , CD4 <sup>+</sup> , CD69 <sup>+</sup> , CD25 <sup>+</sup>                        |
| <b>CD4<sup>+</sup> CM</b><br>CD4 <sup>+</sup> central memory T cells                                                  | Express the chemokine receptor CCR7, allowing them to circulate lymphoid organs and have a strong proliferative capacity but little effector functions (Stubbe, Vanderheyde et al. 2006, Gasper, Tejera et al. 2014).                                           | CD45 <sup>+</sup> , CD3 <sup>+</sup> , CD20 <sup>-</sup> , CD4 <sup>+</sup> , CCR7 <sup>+</sup> , CD45RA <sup>-</sup>                      |
| <b>CD4<sup>+</sup> EM</b><br>CD4 <sup>+</sup> effector memory T cells                                                 | Do not express CCR7 and thus reside in the peripheral tissues. CD4 EM cells produce effector cytokines and have limited proliferative capacity (Stubbe, Vanderheyde et al. 2006, Gasper, Tejera et al. 2014).                                                   | CD45 <sup>+</sup> , CD3 <sup>+</sup> , CD20 <sup>-</sup> , CD4 <sup>+</sup> , CCR7 <sup>-</sup> , CD45RA <sup>-</sup>                      |
| <b>CD4<sup>+</sup> TEMRA</b><br>CD4 <sup>+</sup> terminally differentiated effector memory cells re-expressing CD45RA | Exhibit enhanced expression of effector molecules, providing protective immunity against reoccurring infections (Tian, Babor et al. 2017).                                                                                                                      | CD45 <sup>+</sup> , CD3 <sup>+</sup> , CD20 <sup>-</sup> , CD4 <sup>+</sup> , CCR7 <sup>-</sup> , CD45RA <sup>+</sup>                      |
| <b>CD8<sup>+</sup> naïve T cells</b>                                                                                  | Mature naïve CD8 <sup>+</sup> T cells are deployed to secondary lymphoid organs where they continuously survey for pMHC I molecules (found on all nucleated cells) for antigen recognition (Zhang and Bevan 2011).                                              | CD45 <sup>+</sup> , CD3 <sup>+</sup> , CD20 <sup>-</sup> , CD8 <sup>+</sup> , CD69 <sup>-</sup> , CD25 <sup>-</sup>                        |
| <b>CD8<sup>+</sup> activated T cells</b>                                                                              | Recognize antigens and kill infected or malignant cells by secreting cytokines and cytotoxic granules. Often referred to as cytotoxic T cells (Mahnke, Brodie et al. 2013).                                                                                     | CD45 <sup>+</sup> , CD3 <sup>+</sup> , CD20 <sup>-</sup> , CD8 <sup>+</sup> , CD69 <sup>+</sup> , CD25 <sup>+</sup>                        |
| <b>CD8<sup>+</sup> CM</b><br>CD8 <sup>+</sup> central memory T cells                                                  | Specialized response to systematic infections due to their centralized location in secondary lymphoid organs and superior proliferative abilities (Martin and Badovinac 2018).                                                                                  | CD45 <sup>+</sup> , CD3 <sup>+</sup> , CD20 <sup>-</sup> , CD8 <sup>+</sup> , CCR7 <sup>+</sup> , CD45RA <sup>-</sup>                      |
| <b>CD8<sup>+</sup> EM</b><br>CD8 <sup>+</sup> effector memory T cells                                                 | Specialized response to infections in peripheral tissues due to their cytotoxicity and ability to localize to tissues (Martin and Badovinac 2018).                                                                                                              | CD45 <sup>+</sup> , CD3 <sup>+</sup> , CD20 <sup>-</sup> , CD8 <sup>+</sup> , CCR7 <sup>-</sup> , CD45RA <sup>-</sup>                      |
| <b>CD8<sup>+</sup> TEMRA</b><br>CD8 <sup>+</sup> terminally differentiated effector memory cells re-expressing CD45RA | Exhibit enhanced expression of effector molecules, providing protective immunity against reoccurring infections (Tian, Babor et al. 2017).                                                                                                                      | CD45 <sup>+</sup> , CD3 <sup>+</sup> , CD20 <sup>-</sup> , CD8 <sup>+</sup> , CCR7 <sup>-</sup> , CD45RA <sup>+</sup>                      |

### Supplemental Table 1 – Leukocyte subtypes included in the study.

Immune cell subtypes included in this study, including a brief summary of their functions and cell surface markers used for immunolabeling and FACS.

#### Additional references to Supplemental Table 1:

Chiu, S. and A. Bharat (2016). "Role of monocytes and macrophages in regulating immune response following lung transplantation." *Current opinion in organ transplantation* 21(3): 239-245.

Gasper, D. J., M. M. Tejera and M. Suresh (2014). "CD4 T-cell memory generation and maintenance." *Critical reviews in immunology* 34(2): 121-146.

Hoffman, W., F. G. Lakkis and G. Chalasani (2016). "B Cells, Antibodies, and More." *Clinical journal of the American Society of Nephrology : CJASN* 11(1): 137-154.

Luckheeram, R. V., R. Zhou, A. D. Verma and B. Xia (2012). "CD4<sup>+</sup>T cells: differentiation and functions." *Clinical & developmental immunology* 2012: 925135-925135.

Mahnke, Y. D., T. M. Brodie, F. Sallusto, M. Roederer and E. Lugli (2013). "The who's who of T-cell differentiation: Human memory T-cell subsets." *European Journal of Immunology* 43(11): 2797-2809.

Martin, M. D. and V. P. Badovinac (2018). "Defining Memory CD8 T Cell." *Frontiers in Immunology* 9(2692).

Mayadas, T. N., X. Cullere and C. A. Lowell (2014). "The Multifaceted Functions of Neutrophils." *Annual Review of Pathology: Mechanisms of Disease* 9(1): 181-218.

Stubbe, M., N. Vanderheyde, M. Goldman and A. Marchant (2006). "Antigen-specific central memory CD4<sup>+</sup> T lymphocytes produce multiple cytokines and proliferate in vivo in humans." *J Immunol* 177(11): 8185-8190.

Tian, Y., M. Babor, J. Lane, V. Schulten, V. S. Patil, G. Seumois, S. L. Rosales, Z. Fu, G. Picarda, J. Burel, J. Zapardiel-Gonzalo, R. N. Tennekoon, A. D. De Silva, S. Premawansa, G. Premawansa, A. Wijewickrama, J. A. Greenbaum, P. Vijayanand, D. Weiskopf, A. Sette and B. Peters (2017). "Unique phenotypes and clonal expansions of human CD4 effector memory T cells re-expressing CD45RA." *Nature Communications* 8(1): 1473.

Vivier, E., E. Tomasello, M. Baratin, T. Walzer and S. Ugolini (2008). "Functions of natural killer cells." *Nature Immunology* 9: 503-510.

Zhang, N. and M. J. Bevan (2011). "CD8(+) T cells: foot soldiers of the immune system." *Immunity* 35(2): 161-168.

## Supplemental Table 2

| Subject ID                | Age | Sex | Ethnicity        | CBC-based cell proportions |                 |                 |               |                 |                                | FACS-based cell proportions |                 |              |               |                                  |                                  |                               |                               |                                  |                               |                               |                                  |  |
|---------------------------|-----|-----|------------------|----------------------------|-----------------|-----------------|---------------|-----------------|--------------------------------|-----------------------------|-----------------|--------------|---------------|----------------------------------|----------------------------------|-------------------------------|-------------------------------|----------------------------------|-------------------------------|-------------------------------|----------------------------------|--|
|                           |     |     |                  | Basophils (%)              | Eosinophils (%) | Lymphocytes (%) | Monocytes (%) | Neutrophils (%) | Platelets (10 <sup>9</sup> /L) | B cells (%)                 | Neutrophils (%) | NK cells (%) | Monocytes (%) | CD8 <sup>+</sup> naïve cells (%) | CD4 <sup>+</sup> naïve cells (%) | CD8 <sup>+</sup> CM cells (%) | CD8 <sup>+</sup> EM cells (%) | CD8 <sup>+</sup> TEMRA cells (%) | CD4 <sup>+</sup> CM cells (%) | CD4 <sup>+</sup> EM cells (%) | CD4 <sup>+</sup> TEMRA cells (%) |  |
| <b>Females</b>            |     |     |                  |                            |                 |                 |               |                 |                                |                             |                 |              |               |                                  |                                  |                               |                               |                                  |                               |                               |                                  |  |
| 1                         | 23  | F   | Asian            | 0.3                        | 0.5             | 34.0            | 8.3           | 56.6            | 278                            | 7.52                        | 6.50            | 2.79         | 7.59          | 7.05                             | 9.00                             | 0.91                          | 8.09                          | 6.40                             | 12.19                         | 3.25                          | 0.01                             |  |
| 2                         | 23  | F   | Asian            | 1.2                        | 1.3             | 42.4            | 7.8           | 47.1            | 260                            | 7.45                        | 21.24           | 7.45         | 10.54         | 7.38                             | 12.57                            | 1.08                          | 6.04                          | 0.60                             | 5.65                          | 3.63                          | 0.14                             |  |
| 3                         | 25  | F   | Asian            | 0.6                        | 1.9             | 53.4            | 9.9           | 34              | 355                            | 15.33                       | 1.38            | 2.73         | 2.21          | 10.81                            | 12.24                            | 0.94                          | 9.44                          | 1.76                             | 7.13                          | 5.32                          | 0.11                             |  |
| 4                         | 27  | F   | White            | 0.5                        | 1.4             | 38.6            | 9.1           | 50.2            | 322                            | 6.93                        | 7.31            | 3.98         | 10.27         | 9.34                             | 19.66                            | 1.88                          | 4.86                          | 0.75                             | 15.34                         | 2.37                          | 0.04                             |  |
| 5                         | 32  | F   | White            | 1.1                        | 3.1             | 28.7            | 8.0           | 58.8            | 272                            | 11.74                       | 0.93            | 5.84         | 14.88         | 5.44                             | 17.06                            | 1.80                          | 4.77                          | 3.25                             | 10.50                         | 3.73                          | 0.15                             |  |
| 6                         | 32  | F   | White            | 0.4                        | 5.4             | 32.2            | 7.0           | 54.6            | 157                            | 5.36                        | 10.47           | 12.31        | 7.41          | 5.75                             | 17.83                            | 1.15                          | 3.95                          | 0.62                             | 9.23                          | 3.68                          | 0.05                             |  |
| 7                         | 40  | F   | White            | 0.8                        | 1.1             | 23.3            | 7.9           | 66.6            | 286                            | 8.60                        | 14.84           | 5.99         | 11.26         | 3.27                             | 12.90                            | 1.00                          | 5.21                          | 1.89                             | 10.14                         | 6.00                          | 0.17                             |  |
| 8                         | 41  | F   | White            | 0.5                        | 0.9             | 40.6            | 8.1           | 49.4            | 257                            | 3.59                        | 1.91            | 7.01         | 0.88          | 5.97                             | 3.22                             | 1.18                          | 3.43                          | 1.01                             | 31.03                         | 3.64                          | 0.01                             |  |
| 9                         | 43  | F   | African American | 0.8                        | 0.4             | 46.8            | 6.5           | 45.1            | 199                            | <0.01                       | 3.73            | 7.82         | 6.65          | 3.05                             | 9.20                             | 2.41                          | 5.15                          | 3.37                             | 11.73                         | 11.43                         | 0.57                             |  |
| 10                        | 52  | F   | White            | 1.4                        | 3.7             | 34.7            | 8.7           | 51.3            | 285                            | 7.99                        | 5.31            | 5.73         | 16.30         | 6.65                             | 25.83                            | 1.43                          | 3.22                          | 0.74                             | 8.37                          | 3.14                          | 0.07                             |  |
| 11                        | 57  | F   | Asian            | 0.3                        | 0.6             | 47.5            | 7.5           | 43.8            | 210                            | 6.31                        | 11.89           | 11.43        | 8.46          | 5.51                             | 14.78                            | 1.18                          | 6.79                          | 4.87                             | 5.46                          | 8.02                          | 1.12                             |  |
| <b>Males</b>              |     |     |                  |                            |                 |                 |               |                 |                                |                             |                 |              |               |                                  |                                  |                               |                               |                                  |                               |                               |                                  |  |
| 12                        | 24  | M   | Asian            | 1.6                        | 3.4             | 36.4            | 7.6           | 51              | 299                            | 4.19                        | 0.67            | 18.44        | 9.98          | 16.79                            | 12.03                            | 0.93                          | 3.09                          | 1.57                             | 8.36                          | 3.65                          | 0.01                             |  |
| 13                        | 25  | M   | White            | 0.4                        | 1.1             | 42.6            | 9.7           | 45.4            | 200                            | 5.80                        | 7.24            | 5.68         | 10.24         | 5.30                             | 8.99                             | 2.44                          | 11.18                         | 6.95                             | 11.79                         | 5.33                          | 0.20                             |  |
| 14                        | 26  | M   | Asian            | 0.4                        | 2.2             | 32.6            | 6.3           | 58.1            | 223                            | 5.76                        | 2.75            | 8.18         | 8.38          | 8.46                             | 13.05                            | 1.03                          | 7.74                          | 4.89                             | 9.22                          | 9.16                          | 0.29                             |  |
| 15                        | 29  | M   | African American | 0.2                        | 1.0             | 49.8            | 9.6           | 39.2            | 207                            | 5.24                        | 0.95            | 1.91         | 13.38         | 7.44                             | 6.04                             | 1.76                          | 2.36                          | 27.94                            | 15.96                         | 3.96                          | 0.01                             |  |
| 16                        | 33  | M   | White            | 0.5                        | 4.7             | 22.1            | 11.8          | 60.5            | 220                            | 9.79                        | 10.78           | 13.48        | 22.82         | 4.27                             | 3.19                             | 0.71                          | 1.76                          | 0.62                             | 13.80                         | 3.33                          | 0.01                             |  |
| 17                        | 34  | M   | White            | 0.4                        | 5.7             | 37.8            | 10.0          | 46.1            | 223                            | 11.81                       | 2.48            | 10.91        | 13.39         | 9.77                             | 16.68                            | 1.83                          | 2.92                          | 2.19                             | 11.70                         | 2.68                          | 0.03                             |  |
| 18                        | 40  | M   | White            | 0.6                        | 2.9             | 36.0            | 11.7          | 48.4            | 185                            | 5.44                        | 1.15            | 12.45        | 13.39         | 7.44                             | 13.53                            | 1.42                          | 4.43                          | 1.19                             | 14.34                         | 3.43                          | 0.04                             |  |
| 19                        | 45  | M   | White            | 1.1                        | 2.2             | 31.5            | 9.2           | 55.6            | 259                            | 6.64                        | 15.16           | 11.42        | 4.10          | 5.01                             | 8.14                             | 2.74                          | 3.89                          | 0.42                             | 11.46                         | 6.04                          | 0.05                             |  |
| 20                        | 53  | M   | White            | 0.4                        | 3.4             | 10.7            | 26.2          | 58.9            | 106                            | <0.01                       | 18.80           | 3.59         | 49.14         | 2.26                             | 0.57                             | 0.83                          | 1.50                          | 0.50                             | 5.61                          | 4.03                          | 0.05                             |  |
| 21                        | 56  | M   | Asian            | 0.9                        | 1.8             | 37.1            | 10.0          | 49.8            | 264                            | 3.75                        | 6.94            | 16.24        | 12.05         | 1.30                             | 2.49                             | 3.22                          | 5.82                          | 6.44                             | 10.43                         | 7.83                          | 0.08                             |  |
| <b>Repeat Participant</b> |     |     |                  |                            |                 |                 |               |                 |                                |                             |                 |              |               |                                  |                                  |                               |                               |                                  |                               |                               |                                  |  |
| Repeat-01                 | 34  | M   | White            | 0.6                        | 3.8             | 26.7            | 6.9           | 61.8            | 256                            | 1.57                        | 12.53           | 11.76        | 8.38          | 6.69                             | 7.24                             | 0.96                          | 5.83                          | 3.88                             | 7.46                          | 6.78                          | 0.18                             |  |
| Repeat-02                 | 34  | M   | White            | 0.7                        | 4.5             | 24.7            | 5.9           | 63.7            | 252                            | 1.42                        | 11.71           | 10.01        | 10.70         | 6.78                             | 5.02                             | 0.35                          | 6.28                          | 2.75                             | 4.98                          | 11.81                         | 0.62                             |  |
| Repeat-03                 | 34  | M   | White            | 0.4                        | 3.8             | 25.2            | 6.5           | 64.1            | 232                            | 0.96                        | 31.83           | 7.21         | 7.90          | 5.62                             | 6.47                             | 0.76                          | 3.97                          | 2.41                             | 4.89                          | 4.96                          | 0.27                             |  |
| Repeat-04                 | 34  | M   | White            | 0.4                        | 5.0             | 27.7            | 6.6           | 59.7            | 240                            | 1.27                        | 26.09           | 7.23         | 2.44          | 6.12                             | 5.70                             | 1.35                          | 4.10                          | 2.12                             | 10.12                         | 5.15                          | 0.03                             |  |
| Repeat-05                 | 34  | M   | White            | 0.4                        | 4.2             | 21.9            | 5.3           | 67.5            | 228                            | 1.15                        | 22.93           | 9.38         | 8.55          | 6.29                             | 4.37                             | 1.12                          | 4.95                          | 2.49                             | 8.60                          | 5.92                          | 0.02                             |  |
| Repeat-06                 | 34  | M   | White            | 0.4                        | 5.3             | 25.3            | 6.1           | 62.7            | 242                            | 1.44                        | 23.19           | 9.03         | 10.28         | 6.50                             | 7.02                             | 1.13                          | 4.39                          | 3.03                             | 7.97                          | 4.85                          | 0.13                             |  |
| Repeat-07                 | 34  | M   | White            | 0.4                        | 6.3             | 31.1            | 7.8           | 54              | 231                            | 1.76                        | 3.97            | 10.81        | 13.95         | 9.66                             | 10.84                            | 1.29                          | 4.60                          | 3.68                             | 10.05                         | 5.61                          | 0.17                             |  |
| Repeat-08                 | 34  | M   | White            | 0.4                        | 5.4             | 37.4            | 7.9           | 48.5            | 244                            | 1.81                        | 4.76            | 5.65         | 14.18         | 11.36                            | 9.02                             | 1.41                          | 4.69                          | 2.22                             | 14.53                         | 8.09                          | 0.10                             |  |
| Repeat-09                 | 34  | M   | White            | 0.5                        | 3.8             | 21.0            | 6.4           | 67.9            | 242                            | 0.86                        | 28.71           | 5.82         | 13.62         | 5.21                             | 6.52                             | 1.03                          | 3.34                          | 1.69                             | 7.98                          | 4.86                          | 0.10                             |  |

### Supplemental Table 2 – CBC- and FACS-based cell proportions for all study participants and time points.

Participants are ordered by age. CBC measurements were performed using a Sysmex XN-9000™ instrument, and FACS-based cell proportions were determined using a BD™ Influx cell sorter. (See *Supplemental Methods and Procedures* for details).

## Supplemental Table 3

|                              | Neutrophils | NK cells | Monocytes | CD8+ naïve | CD4+ naïve | CD8+ CM & EM | CD4+ CM & EM | PBMCs | Average      |
|------------------------------|-------------|----------|-----------|------------|------------|--------------|--------------|-------|--------------|
| <b>Measured parameters</b>   |             |          |           |            |            |              |              |       |              |
| <b>Citrate synthase (CS)</b> | 9.1%        | 5.5%     | 4.1%      | 4.6%       | 6.7%       | 6.6%         | 6.9%         | 7.1%  | <b>6.2%</b>  |
| <b>mtDNAcn</b>               | 6.6%        | 4.6%     | 4.2%      | 5.4%       | 4.9%       | 6.0%         | 4.0%         | 4.8%  | <b>5.1%</b>  |
| <b>Complex I</b>             | 27.3%       | 15.4%    | 12.1%     | 16.9%      | 14.2%      | 12.9%        | 17.2%        | 16.6% | <b>16.6%</b> |
| <b>Complex II</b>            | 7.6%        | 8.9%     | 9.2%      | 8.9%       | 8.7%       | 14.2%        | 11.0%        | 6.0%  | <b>9.8%</b>  |
| <b>Complex IV</b>            | 14.5%       | 33.6%    | 19.4%     | 18.1%      | 40.3%      | 24.1%        | 23.6%        | 13.8% | <b>24.8%</b> |
| <b>Calculated parameters</b> |             |          |           |            |            |              |              |       |              |
| <b>MHI</b>                   | 9.0%        | 10.6%    | 7.7%      | 12.7%      | 10.4%      | 10.8%        | 11.4%        | 6.1%  | <b>10.4%</b> |

**Supplemental Table 3 – Technical variation for each mitochondrial assay and calculated MHI by cell type.**

Coefficients of variation (C.V.s) across 2-5 biological replicates (different 5M cell pellet isolated from the same blood draw) for each cell subtype and PBMCs (See *Supplemental Methods and Procedures* for details).

## Supplemental Table 4

**Counting cocktail** contains markers for activated T cells and was used to label  $2 \times 10^6$  cells to determine the abundance of each cell subtype prior to sorting.  
**Sorting cocktail** contains markers for memory T cells, used to isolate subpopulations by FACS.

| Cocktail          |    | Marker        | Fluorophore   | Volume | Catalog number   |
|-------------------|----|---------------|---------------|--------|------------------|
| Counting cocktail | 1  | CD20          | A700          | 2.5ul  | BioLegend 302322 |
|                   | 2  | CD3           | FITC          | 2.5ul  | BioLegend 300406 |
|                   | 3  | CD4           | BV650         | 2.5ul  | BioLegend 317435 |
|                   | 4  | CD8           | BV711         | 2.5ul  | BioLegend 301043 |
|                   | 5  | CD56          | PE-Dazzle 594 | 2.5ul  | BioLegend 362543 |
|                   | 6  | CD16          | APC-Cy7       | 2.5ul  | BioLegend 302017 |
|                   | 7  | CD14          | PE-Cy7        | 2.5ul  | BioLegend 367111 |
|                   | 8  | HLA-DR        | PerCP-Cy5.5   | 2.5ul  | BioLegend 307629 |
|                   | 9  | CD45          | BV510         | 2.5ul  | BioLegend 368525 |
|                   | 10 | CD15          | BV786         | 2.5ul  | BioLegend 323043 |
|                   | 11 | CD11c         | BV605         | 2.5ul  | BioLegend 301636 |
|                   | 12 | CD69          | PE            | 2.5ul  | BioLegend 310906 |
|                   | 13 | CD25          | APC           | 2.5ul  | BioLegend 356110 |
|                   | 14 | Viability Dye | DAPI          | 2ug/l  | BD 564907        |
| Sorting cocktail  | 1  | CD20          | A700          | 25ul   | BioLegend 302322 |
|                   | 2  | CD3           | FITC          | 25ul   | BioLegend 300406 |
|                   | 3  | CD4           | BV650         | 25ul   | BioLegend 317435 |
|                   | 4  | CD8           | BV711         | 25ul   | BioLegend 301043 |
|                   | 5  | CD56          | PE-Dazzle 594 | 25ul   | BioLegend 362543 |
|                   | 6  | CD16          | APC-Cy7       | 25ul   | BioLegend 302017 |
|                   | 7  | CD14          | PE-Cy7        | 25ul   | BioLegend 367111 |
|                   | 8  | HLA-DR        | PerCP-Cy5.5   | 25ul   | BioLegend 307629 |
|                   | 9  | CD45          | BV510         | 25ul   | BioLegend 368525 |
|                   | 10 | CD15          | BV786         | 25ul   | BioLegend 323043 |
|                   | 11 | CCR7          | PE            | 25ul   | BioLegend 353203 |
|                   | 12 | CD45RA        | APC           | 25ul   | BioLegend 304111 |
|                   | 13 | Viability Dye | DAPI          | 2ug/l  | BD 564907        |

All tubes are 5 ml Polypropylene (ThermoFisher #352063)

**Supplemental Table 4 – Recipes for antibody cocktails used to detect cell surface markers for FACS-based cell proportions and sorting.**  
 (See *Supplemental Methods and Procedures* for details).
